# Supplementary material for: Mid-Holocene climate change over China: model–data discrepancy
Source: Copernicus journal article supplement (doi:10.5194/cp-15-1223-2019), 2019-07-02
Supplement: Supplementary file 1 [file cp-15-1223-2019-supplement.pdf]

Supplement of *Clim. Past*, 15, 1223–1249, 2019  
<https://doi.org/10.5194/cp-15-1223-2019-supplement>  
© Author(s) 2019. This work is distributed under  
the Creative Commons Attribution 4.0 License.

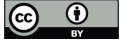

*Supplement of*

## **Mid-Holocene climate change over China: model–data discrepancy**

**Yating Lin et al.**

*Correspondence to:* Haibin Wu ([haibin-wu@mail.iggcas.ac.cn](mailto:haibin-wu@mail.iggcas.ac.cn))

The copyright of individual parts of the supplement might differ from the CC BY 4.0 License.

## Supplementary Information

**Table S1. Biome assignment rules in BIOME4 (ajusted from Dallmeyer et al., 2017)**

| <b>NO.</b> | <b>BIOME</b>                       | <b>Domain PFT</b>           | <b>Subpft</b>                                                                 | <b>Additional Environment Limits</b> | <b>Mega-biomes</b>       |                         |
|------------|------------------------------------|-----------------------------|-------------------------------------------------------------------------------|--------------------------------------|--------------------------|-------------------------|
| 1          | Tropical evergreen forest          | Tropical evergreen trees    | -                                                                             | -                                    | <b>Tropical forest</b>   |                         |
|            |                                    | Tropical deciduous trees    | -                                                                             | number of green days>300             |                          |                         |
| 2          | Tropical semi-deciduous forest     | Tropical deciduous trees    | -                                                                             | 250<number of green days<300         |                          |                         |
| 3          | Tropical deciduous forest/woodland | Tropical deciduous trees    | -                                                                             | number of green days<250             |                          |                         |
| 4          | Temperate deciduous forest         | Temperate deciduous trees   | No temperate broadleaved or boreal evergreen tree present                     | -                                    |                          | <b>Temperate Forest</b> |
|            |                                    | Temperate deciduous trees   | Boreal evergreen trees present                                                | Twm>21                               |                          |                         |
|            |                                    | Boreal evergreen trees      | Temperate deciduous trees present                                             | GDD5>900 and Tcm>-19, Twm>21         |                          |                         |
|            |                                    | Boreal deciduous trees      | Temperate deciduous trees                                                     | -                                    |                          |                         |
| 5          | Temperate conifer forest           | Cool conifer                | No temperate broadleaved trees present, no boreal deciduous trees subdominant | -                                    |                          |                         |
|            |                                    | Cool conifer                | Temperate deciduous trees with nearly similar NPP                             | -                                    |                          |                         |
| 7          | Cool mixed forest                  | Temperate deciduous trees   | Boreal evergreen trees present                                                | Twm<21 and Tcm>-15                   |                          |                         |
|            |                                    | Boreal evergreen trees      | Temperate deciduous trees present                                             | GDD5>900 and Tcm>-19, Twm<21         |                          |                         |
| 8          | Cool conifer forest                | Boreal evergreen trees      | No temperate deciduous trees present                                          | GDD5>900 and Tcm>-19                 |                          |                         |
| 16         | Temperate broadleaved savanna      | Shrubs                      | Temperate deciduous trees present                                             | -                                    |                          |                         |
| 6          | Warm mixed forest                  | Temperate broadleaved trees | -                                                                             | -                                    | <b>Warm mixed forest</b> |                         |
|            |                                    | Temperate deciduous trees   | No boreal trees, but temperate broadleaved trees present                      | -                                    |                          |                         |
|            |                                    | Temperate deciduous trees   | No boreal trees, but cool conifer present                                     | Tcm>3 and GDD5>3000                  |                          |                         |
|            |                                    | Cool conifer                | Temperate broadleaved trees present                                           | -                                    |                          |                         |
| 9          |                                    | Temperate deciduous trees   | Boreal evergreen trees present                                                | Twm<21 and Tcm<-15                   |                          |                         |

|           |                                       |                                        |                                        |                                  |                      |
|-----------|---------------------------------------|----------------------------------------|----------------------------------------|----------------------------------|----------------------|
|           | <b>Cold mixed forest</b>              | Cool conifer                           | Boreal deciduous trees                 | -                                | <b>Boreal forest</b> |
|           |                                       | Boreal evergreen trees                 | Temperate deciduous trees present      | GDD5<900 and Tcm<-19             |                      |
|           |                                       | Boreal deciduous trees                 | Cool conifer                           | -                                |                      |
|           |                                       | Boreal deciduous trees                 | -                                      | GDD5>900 and Tcm>-19             |                      |
| <b>10</b> | <b>Evergreen taiga/montane forest</b> | Boreal evergreen trees                 | No temp deciduous trees present        | GDD5<900 and Tcm<-19 and NPP>350 |                      |
|           |                                       | Boreal deciduous trees                 | Boreal evergreen trees                 | -                                |                      |
| <b>11</b> | <b>Deciduous taiga/montane forest</b> | Boreal deciduous trees                 | No temperate deciduous or cool conifer | GDD5<900 and Tcm<-19             |                      |
| <b>18</b> | <b>Boreal parkland</b>                | Boreal evergreen trees                 | -                                      | GDD5<900 and Tcm<-19 and NPP<350 |                      |
|           |                                       | Shrubs                                 | Boreal trees present                   | Twm<21                           |                      |
|           |                                       | Boreal deciduous trees                 | -                                      | -                                |                      |
| <b>13</b> | <b>Tropical xerophytic shrubland</b>  | Woody desert                           | -                                      | grass LAI>1 and Tmin>0           |                      |
|           |                                       | Shrubs                                 | Tropical trees present                 | woody LAI<4                      |                      |
| <b>14</b> | <b>Temperate sclerophyll woodland</b> | Shrubs                                 | Temperate broadleaved trees present    | -                                |                      |
| <b>19</b> | <b>Tropical grassland</b>             | C4 tropical grass                      | -                                      | -                                |                      |
| <b>20</b> | <b>Temperate grassland</b>            | C3/C4 temperate grass                  | -                                      | GDD0>800                         |                      |
| <b>12</b> | <b>Tropical savannah</b>              | Shrubs                                 | Tropical trees present                 | woody LAI>4                      |                      |
| <b>15</b> | <b>Temperate xerophytic shrubland</b> | Woody desert                           | -                                      | grass LAI>1 and Tmin<0           |                      |
| <b>17</b> | <b>Open conifer woodland</b>          | Shrubs                                 | Cool conifer present                   | -                                |                      |
| <b>21</b> | <b>Desert</b>                         | Woody desert                           | -                                      | grass LAI<1                      |                      |
|           |                                       | Temperate or Tropical trees or conifer | -                                      | NPP<100                          |                      |
|           |                                       | C3/C4 temperate grass                  | No boreal trees present                | -                                |                      |
| <b>22</b> | <b>Steppe-tundra</b>                  | C3/C4 temperate grass                  | -                                      | GDD0<800                         |                      |
|           |                                       | Cold herbaceous                        | -                                      | -                                |                      |
| <b>23</b> | <b>Shrub tundra</b>                   | Tundra shrub                           | -                                      | GDD0>500                         |                      |
| <b>24</b> | <b>Dwarf shrub tundra</b>             | Tundra shrub                           | -                                      | 200<GDD0<500                     |                      |
| <b>25</b> | <b>Prostrate shrub tundra</b>         | Tundra shrub                           | -                                      | GDD0<200                         |                      |
|           |                                       |                                        |                                        |                                  | <b>Tundra</b>        |

|    |                                 |             |   |   |  |
|----|---------------------------------|-------------|---|---|--|
| 26 | Cushion forb lichen moss tundra | Lichen/forb | - | - |  |
|----|---------------------------------|-------------|---|---|--|

**Table S2. Transfer matrix from BIOME4 typology to the pollen biome scores**

| BIOME4 type | Pollen biome type |      |      |      |      |      |      |      |      |      |      |      |      |      |      |      |      |
|-------------|-------------------|------|------|------|------|------|------|------|------|------|------|------|------|------|------|------|------|
|             | CLDE              | CLMX | COCO | COMX | DESE | STEP | TAIG | TEDE | TUND | XERO | HODE | SAVA | TDFO | TRFO | TSFO | WAMX | TXWS |
| TrEgFo      | 0                 | 0    | 0    | 0    | 0    | 0    | 0    | 0    | 0    | 0    | 0    | 0    | 5    | 15   | 10   | 0    | 0    |
| TrSeDeFo    | 0                 | 0    | 0    | 0    | 0    | 0    | 0    | 0    | 0    | 0    | 0    | 0    | 10   | 10   | 15   | 0    | 5    |
| TrDeFo      | 0                 | 0    | 0    | 0    | 0    | 0    | 0    | 0    | 0    | 0    | 0    | 5    | 15   | 5    | 10   | 0    | 0    |
| TdDeFo      | 0                 | 5    | 5    | 10   | 0    | 0    | 0    | 15   | 0    | 0    | 0    | 0    | 0    | 0    | 0    | 0    | 0    |
| TeCoFo      | 0                 | 0    | 15   | 10   | 0    | 0    | 0    | 5    | 0    | 0    | 0    | 0    | 0    | 0    | 0    | 0    | 0    |
| WaMxFo      | 0                 | 0    | 0    | 0    | 0    | 0    | 0    | 10   | 0    | 10   | 0    | 0    | 0    | 0    | 0    | 15   | 0    |
| CoMxFo      | 0                 | 0    | 10   | 15   | 0    | 0    | 0    | 10   | 0    | 0    | 0    | 0    | 0    | 0    | 0    | 0    | 0    |
| CoCoFo      | 0                 | 0    | 15   | 10   | 0    | 0    | 5    | 0    | 0    | 0    | 0    | 0    | 0    | 0    | 0    | 0    | 0    |
| CIMxFo      | 10                | 15   | 0    | 0    | 0    | 0    | 10   | 0    | 0    | 0    | 0    | 0    | 0    | 0    | 0    | 0    | 0    |
| EgTaig      | 5                 | 10   | 5    | 0    | 0    | 0    | 15   | 0    | 0    | 0    | 0    | 0    | 0    | 0    | 0    | 0    | 0    |
| DeTaig      | 10                | 5    | 0    | 0    | 0    | 0    | 15   | 0    | 5    | 0    | 0    | 0    | 0    | 0    | 0    | 0    | 0    |
| TrSav       | 0                 | 0    | 0    | 0    | 0    | 5    | 0    | 0    | 0    | 0    | 0    | 15   | 5    | 0    | 0    | 0    | 10   |
| TrXsSl      | 0                 | 0    | 0    | 0    | 0    | 10   | 0    | 0    | 0    | 0    | 0    | 5    | 0    | 0    | 0    | 0    | 15   |
| TeXsSl      | 0                 | 0    | 0    | 0    | 0    | 5    | 0    | 0    | 0    | 15   | 0    | 0    | 0    | 0    | 0    | 5    | 0    |
| TeScWo      | 0                 | 0    | 0    | 0    | 0    | 5    | 0    | 0    | 0    | 15   | 0    | 5    | 0    | 0    | 0    | 10   | 0    |
| TeBlSav     | 0                 | 0    | 0    | 0    | 0    | 5    | 0    | 5    | 0    | 5    | 0    | 15   | 0    | 0    | 0    | 5    | 0    |
| OpCoWo      | 0                 | 0    | 10   | 0    | 0    | 5    | 0    | 0    | 0    | 0    | 0    | 0    | 0    | 0    | 0    | 0    | 0    |
| BoprKl      | 0                 | 0    | 5    | 0    | 0    | 10   | 10   | 0    | 0    | 5    | 0    | 0    | 0    | 0    | 0    | 0    | 0    |
| TrGrl       | 0                 | 0    | 0    | 0    | 0    | 15   | 0    | 0    | 0    | 0    | 5    | 5    | 0    | 0    | 0    | 0    | 0    |
| TeGrlc      | 0                 | 0    | 0    | 0    | 5    | 15   | 0    | 0    | 5    | 0    | 0    | 0    | 0    | 0    | 0    | 0    | 0    |
| TeGrlw      | 0                 | 0    | 0    | 0    | 5    | 15   | 0    | 0    | 0    | 5    | 0    | 5    | 0    | 0    | 0    | 0    | 0    |
| HotDesert   | 0                 | 0    | 0    | 0    | 0    | 10   | 0    | 0    | 0    | 0    | 15   | 0    | 0    | 0    | 0    | 0    | 0    |
| Desert      | 0                 | 0    | 0    | 0    | 15   | 10   | 0    | 0    | 0    | 0    | 0    | 0    | 0    | 0    | 0    | 0    | 0    |
| ShTund      | 5                 | 0    | 0    | 0    | 0    | 14   | 5    | 0    | 15   | 0    | 0    | 0    | 0    | 0    | 0    | 0    | 0    |
| DShtund     | 0                 | 0    | 0    | 0    | 0    | 5    | 0    | 0    | 15   | 0    | 0    | 0    | 0    | 0    | 0    | 0    | 0    |
| PsShTund    | 0                 | 0    | 0    | 0    | 0    | 5    | 0    | 0    | 15   | 0    | 0    | 0    | 0    | 0    | 0    | 0    | 0    |
| FoLimoss    | 0                 | 0    | 0    | 0    | 0    | 0    | 0    | 0    | 10   | 0    | 0    | 0    | 0    | 0    | 0    | 0    | 0    |
| Barren      | 0                 | 0    | 0    | 0    | 0    | 0    | 0    | 0    | 0    | 0    | 0    | 0    | 0    | 0    | 0    | 0    | 0    |
| Llce        | 0                 | 0    | 0    | 0    | 0    | 0    | 0    | 0    | 0    | 0    | 0    | 0    | 0    | 0    | 0    | 0    | 0    |

We divided temperate grassland into cool temperate grassland (TeGrlc) and warm temperate grassland (TeGrlw), and desert into cold desert (Desert) and hot desert (Hot Desert), based on the minimum temperature (22°C) of the mean temperature of the warmest month (Prentice et al. 1992). The full name of the BIOME4 types and pollen biome types are listed as below:

|           |                                                     |      |                                         |
|-----------|-----------------------------------------------------|------|-----------------------------------------|
| Barren    | barren land                                         | CLDE | cold deciduous forest                   |
| BoPrkl    | boreal parkland                                     | CLMX | cold mixed forest                       |
| CIMxFo    | cold mixed forest                                   | COCO | cool coniferous forest                  |
| CoCoFo    | cool evergreen needleleaf forest                    | COMX | cool mixed forest                       |
| CoMxFo    | cool mixed forest                                   | DESE | desert                                  |
| Desert    | desert                                              | HODE | hot desert                              |
| DeTaig    | cold deciduous forest                               | SAVA | savanna                                 |
| DshTund   | erect dwarf-shrub tundra                            | STEP | steppe                                  |
| EgTaig    | cold evergreen needleleaf forest                    | TAIG | taiga                                   |
| FoliMoss  | cushion-forb lichen, and moss tundra                | TDFO | tropical dry forest                     |
| HotDesert | hot desert                                          | TEDE | temperate deciduous forest              |
| LIce      | land ice                                            | TRFO | tropical rain forest                    |
| OpCoWo    | temperate evergreen needleleaf open woodland        | TSFO | tropical seasonal forest                |
| PsShTund  | prostrate dwarf-shrub tundra                        | TUND | tundra                                  |
| ShTund    | low and high shrub tundra                           | TXWS | tropical xerophytic woods/scrub         |
| TeBlSav   | temperate deciduous broadleaved savanna             | WAMX | broadleaved evergreen/warm mixed forest |
| TeCoFo    | temperate evergreen needleleaf forest               | XERO | xerophytic woods/scrub                  |
| TeDeFo    | temperate deciduous broadleaf forest                |      |                                         |
| TeGrlc    | cool temperate grassland                            |      |                                         |
| TeGrlw    | warm temperate grassland                            |      |                                         |
| TeScWo    | temperate sclerophyll woodland and shrubland        |      |                                         |
| TeXsSl    | temperate xerophytic shrubland                      |      |                                         |
| TrSeDefo  | tropical deciduous broadleaf forest and woodland    |      |                                         |
| TrEgFo    | tropical evergreen broadleaf forest                 |      |                                         |
| TrGrl     | tropical grassland                                  |      |                                         |
| TrSav     | tropical savanna                                    |      |                                         |
| TrSeDeFo  | tropical semi-evergreen broadleaf forest            |      |                                         |
| TrXsSl    | tropical xerophytic shrubland                       |      |                                         |
| WaMxFo    | warm-temperate evergreen broadleaf and mixed forest |      |                                         |

**Table S3. The ranges of input parameters for simulation at modern, mid-Holocene periods**

| <i>Parameter</i>        | <i>Modern</i> | <i>Mid-Holocene</i> |
|-------------------------|---------------|---------------------|
| $\Delta T_{jan}$        | [-10,10]°C    | [-10,10]°C          |
| $\Delta T_{jul}$        | [-10,10]°C    | [-10,10]°C          |
| $\Delta P_{jan}$        | [-90,100]%    | [-90,100]%          |
| $\Delta P_{jul}$        | [-90,100]%    | [-90,100]%          |
| $CO_2$                  | 340ppmv       | 270ppmv             |
| <i>Iterative number</i> | 2000          | 3000                |

**Table S4. The biome score from IVM for each pollen site collected from published paper**

| Site          | Biome | lati  | long   | TRFO  | TSFO  | TDFO | CLDE  | TAIG  | CLMX  | COCO  | COMX  | TEDE  | WAMX  | XERO  | TUND  | STEP  | DESE  |
|---------------|-------|-------|--------|-------|-------|------|-------|-------|-------|-------|-------|-------|-------|-------|-------|-------|-------|
| Sujiawan      | COMX  | 35.54 | 104.52 | 1.30  | 2.20  | 3.40 | 7.50  | 9.80  | 9.70  | 11.00 | 12.00 | 11.60 | 10.70 | 7.50  | 6.00  | 8.40  | 6.00  |
| Xiaogou       | COMX  | 36.10 | 104.90 | 1.40  | 1.40  | 0.00 | 6.80  | 14.70 | 12.20 | 20.00 | 20.80 | 13.00 | 9.00  | 6.80  | 1.30  | 5.10  | 4.50  |
| Dadiwan       | STEP  | 35.01 | 105.91 | 0.80  | 3.30  | 7.40 | 4.30  | 4.30  | 7.60  | 5.10  | 8.80  | 11.30 | 8.30  | 3.70  | 10.10 | 15.30 | 10.20 |
| Sanjiaocheng  | DESE  | 39.01 | 103.34 | 0.00  | 0.00  | 3.50 | 1.40  | 2.90  | 1.40  | 2.90  | 3.50  | 2.00  | 2.00  | 1.40  | 11.60 | 12.90 | 13.90 |
| Chadianpo     | TEDE  | 36.10 | 114.40 | 0.00  | 0.00  | 3.40 | 10.20 | 10.20 | 10.20 | 10.20 | 12.50 | 15.70 | 13.30 | 7.80  | 5.80  | 6.00  | 2.70  |
| Qindeli       | COMX  | 48.08 | 133.25 | 0.00  | 2.20  | 3.50 | 12.50 | 17.40 | 14.70 | 12.50 | 21.60 | 18.90 | 11.20 | 2.10  | 7.80  | 7.80  | 6.40  |
| Fuyuanhuangye | TEDE  | 47.35 | 133.03 | 0.00  | 6.30  | 8.20 | 7.10  | 8.70  | 17.60 | 8.70  | 25.40 | 34.30 | 18.30 | 1.50  | 11.40 | 6.80  | 2.40  |
| Jingbo Lake   | TEDE  | 43.83 | 128.50 | 0.00  | 2.30  | 3.30 | 8.40  | 8.40  | 11.30 | 8.40  | 22.80 | 27.50 | 20.40 | 4.20  | 5.20  | 3.50  | 2.60  |
| Hani Lake     | TEDE  | 42.22 | 126.52 | 0.00  | 3.10  | 3.10 | 4.90  | 4.90  | 9.00  | 4.90  | 17.00 | 24.70 | 18.80 | 3.00  | 5.20  | 2.50  | 2.50  |
| Jinchuan      | TEDE  | 42.37 | 126.43 | 0.00  | 2.40  | 2.90 | 3.50  | 3.50  | 6.70  | 3.50  | 15.90 | 22.50 | 17.40 | 1.60  | 7.60  | 1.80  | 1.30  |
| Maar Lake     | TEDE  | 42.30 | 126.37 | 0.00  | 3.30  | 3.30 | 1.70  | 1.70  | 6.60  | 1.70  | 15.50 | 25.10 | 19.70 | 1.10  | 0.60  | 0.00  | 0.00  |
| Maar Lake     | TEDE  | 42.30 | 126.37 | 0.00  | 3.30  | 3.30 | 1.70  | 1.70  | 6.60  | 1.70  | 15.50 | 25.10 | 19.70 | 1.10  | 0.60  | 0.00  | 0.00  |
| Xie Lake SO4  | WAMX  | 37.38 | 122.52 | 3.50  | 3.50  | 0.00 | 6.70  | 6.70  | 6.70  | 6.70  | 16.90 | 17.70 | 19.70 | 4.10  | 2.60  | 4.70  | 4.70  |
| Nanhuiheming  | WAMX  | 31.05 | 121.58 | 4.60  | 4.60  | 1.40 | 6.50  | 6.50  | 6.50  | 6.50  | 9.90  | 10.70 | 15.30 | 11.10 | 3.50  | 7.80  | 6.40  |
| Toushe        | WAMX  | 23.82 | 120.88 | 8.50  | 10.00 | 6.70 | 6.00  | 6.00  | 7.50  | 6.00  | 10.10 | 17.10 | 20.00 | 4.20  | 11.20 | 6.50  | 1.40  |
| Dongyuan Lake | WAMX  | 22.17 | 120.83 | 14.60 | 14.60 | 5.60 | 0.00  | 0.00  | 0.00  | 0.00  | 2.60  | 6.80  | 15.40 | 0.00  | 7.10  | 5.60  | 0.00  |
| Yonglong CY   | WAMX  | 31.78 | 120.44 | 7.30  | 7.30  | 1.70 | 6.40  | 6.40  | 8.10  | 8.10  | 11.00 | 11.00 | 16.50 | 12.00 | 4.90  | 4.90  | 3.10  |

|                        |      |       |        |       |       |       |       |       |       |       |       |       |       |      |       |       |       |
|------------------------|------|-------|--------|-------|-------|-------|-------|-------|-------|-------|-------|-------|-------|------|-------|-------|-------|
| Hangzhou HZ3           | TEDE | 30.30 | 120.33 | 1.40  | 2.70  | 2.60  | 11.10 | 12.60 | 13.90 | 14.10 | 18.70 | 19.90 | 15.20 | 9.20 | 4.80  | 5.10  | 3.80  |
| Xinhua XH1             | WAMX | 32.93 | 119.83 | 8.10  | 8.80  | 7.00  | 1.10  | 1.10  | 1.80  | 1.10  | 1.80  | 5.40  | 12.70 | 4.00 | 8.50  | 12.50 | 6.20  |
| ZK01                   | WAMX | 31.77 | 119.80 | 9.30  | 9.40  | 5.20  | 1.60  | 1.60  | 2.20  | 1.60  | 2.20  | 4.30  | 13.00 | 5.40 | 7.20  | 9.50  | 3.50  |
| Chifeng                | TEDE | 43.97 | 119.37 | 0.00  | 1.70  | 1.70  | 4.50  | 4.50  | 7.40  | 4.50  | 12.40 | 15.30 | 7.90  | 0.00 | 5.10  | 11.30 | 10.90 |
| SZK1                   | WAMX | 26.08 | 119.31 | 6.40  | 6.40  | 2.20  | 5.00  | 5.00  | 5.00  | 5.00  | 5.00  | 12.10 | 18.50 | 8.80 | 2.20  | 5.40  | 3.20  |
| Gucheng                | WAMX | 31.28 | 118.90 | 12.20 | 12.20 | 4.30  | 5.90  | 5.90  | 5.90  | 5.90  | 8.40  | 8.70  | 18.50 | 7.90 | 6.80  | 6.60  | 2.40  |
| Lulong                 | TEDE | 39.87 | 118.87 | 0.00  | 0.00  | 0.90  | 5.20  | 6.30  | 5.20  | 6.30  | 10.00 | 12.00 | 11.10 | 4.20 | 4.20  | 9.00  | 9.80  |
| Hulun Lake             | STEP | 48.92 | 117.42 | 0.00  | 0.00  | 1.90  | 4.80  | 5.20  | 5.60  | 5.20  | 10.00 | 10.50 | 5.60  | 0.80 | 7.50  | 14.50 | 12.50 |
| CH-1                   | WAMX | 31.56 | 117.39 | 12.10 | 15.20 | 6.50  | 2.10  | 2.10  | 2.10  | 2.10  | 2.60  | 5.20  | 16.70 | 7.40 | 7.30  | 8.00  | 4.60  |
| Sanyi profile          | STEP | 43.62 | 117.38 | 0.00  | 0.00  | 1.90  | 2.00  | 2.00  | 2.00  | 2.00  | 2.00  | 2.00  | 2.00  | 2.00 | 3.60  | 15.20 | 13.30 |
| Xiaoniuchang           | COMX | 42.62 | 116.82 | 0.00  | 0.00  | 0.00  | 9.70  | 11.60 | 9.70  | 11.60 | 19.70 | 17.80 | 9.70  | 1.60 | 8.10  | 4.70  | 4.70  |
| Haoluku                | COMX | 42.87 | 116.76 | 0.00  | 0.00  | 0.00  | 4.60  | 5.40  | 5.20  | 5.40  | 11.30 | 10.50 | 5.30  | 0.00 | 4.60  | 9.90  | 9.90  |
| Liuzhouwan             | COMX | 42.71 | 116.68 | 0.00  | 0.00  | 0.00  | 10.60 | 10.60 | 10.60 | 10.60 | 14.60 | 14.60 | 11.30 | 7.30 | 3.30  | 6.40  | 6.40  |
| Poyang Lake 103        | WAMX | 28.87 | 116.25 | 13.30 | 13.30 | 0.00  | 0.00  | 0.00  | 0.00  | 0.00  | 0.00  | 0.90  | 13.60 | 4.90 | 0.00  | 3.70  | 3.70  |
| Baiyangdian            | TEDE | 38.92 | 115.84 | 0.00  | 0.00  | 0.00  | 7.90  | 10.20 | 10.20 | 10.20 | 18.10 | 21.90 | 16.60 | 5.00 | 3.00  | 8.30  | 10.20 |
| Bayanchagan            | TEDE | 42.08 | 115.35 | 0.00  | 1.80  | 4.60  | 7.00  | 8.20  | 11.60 | 9.40  | 17.50 | 19.80 | 12.10 | 3.90 | 6.60  | 10.70 | 8.80  |
| Huangjiapu             | STEP | 40.57 | 115.15 | 2.30  | 2.30  | 0.90  | 1.90  | 1.90  | 1.90  | 1.90  | 4.50  | 4.50  | 4.10  | 0.40 | 4.70  | 13.60 | 12.70 |
| Dingnan                | TSFO | 24.68 | 115.00 | 10.50 | 21.90 | 11.30 | 6.10  | 6.10  | 11.90 | 6.10  | 11.90 | 17.70 | 16.70 | 1.70 | 5.00  | 3.60  | 2.20  |
| Guang1                 | STEP | 36.02 | 114.53 | 0.00  | 0.70  | 3.80  | 1.90  | 1.90  | 2.60  | 1.90  | 4.80  | 6.10  | 5.40  | 1.90 | 3.50  | 17.40 | 10.30 |
| Angulinao              | COMX | 41.33 | 114.35 | 0.00  | 0.00  | 1.00  | 7.10  | 9.40  | 7.50  | 9.40  | 13.40 | 11.60 | 9.20  | 5.10 | 4.10  | 10.70 | 10.60 |
| Yangyuanxipu           | STEP | 40.12 | 114.22 | 0.00  | 0.00  | 5.30  | 2.60  | 3.60  | 2.60  | 3.60  | 3.60  | 2.60  | 2.60  | 2.60 | 7.00  | 17.20 | 10.20 |
| Shenzhen Sx97          | WAMX | 22.75 | 113.78 | 12.80 | 12.80 | 1.80  | 0.50  | 0.50  | 0.50  | 0.50  | 0.50  | 4.10  | 13.40 | 7.10 | 6.60  | 4.40  | 2.60  |
| GZ-2                   | TSFO | 22.71 | 113.51 | 9.80  | 13.90 | 8.10  | 6.10  | 6.10  | 6.10  | 6.10  | 6.10  | 6.10  | 11.20 | 7.10 | 4.00  | 4.00  | 0.00  |
| Daihai99a              | COMX | 40.55 | 112.66 | 0.00  | 0.00  | 1.00  | 6.50  | 6.50  | 8.20  | 6.50  | 12.70 | 12.70 | 8.90  | 4.40 | 3.10  | 10.20 | 10.10 |
| Daihai                 | COMX | 40.55 | 112.66 | 0.00  | 0.00  | 0.90  | 6.70  | 7.00  | 8.20  | 7.00  | 13.20 | 12.90 | 9.20  | 4.50 | 3.00  | 10.10 | 9.90  |
| Sihenan profile        | STEP | 34.80 | 112.40 | 0.00  | 0.00  | 3.10  | 1.30  | 1.30  | 1.30  | 1.30  | 1.30  | 1.30  | 1.30  | 1.30 | 3.10  | 14.30 | 11.20 |
| Diaojiaohaizi          | COMX | 41.30 | 112.35 | 0.00  | 0.00  | 0.00  | 11.30 | 11.30 | 11.30 | 11.30 | 17.20 | 17.20 | 12.90 | 6.90 | 4.30  | 4.80  | 6.10  |
| Ganhaizi               | TEDE | 39.00 | 112.30 | 0.00  | 0.00  | 0.00  | 10.40 | 10.40 | 10.40 | 10.40 | 16.50 | 17.80 | 14.70 | 7.30 | 3.20  | 4.30  | 4.30  |
| Jiangling profile      | WAMX | 30.35 | 112.18 | 4.50  | 6.50  | 6.30  | 4.80  | 4.80  | 4.80  | 4.80  | 6.80  | 9.20  | 13.20 | 6.80 | 7.70  | 11.20 | 6.90  |
| Helingeer              | DESE | 40.38 | 111.82 | 1.20  | 2.40  | 1.20  | 0.00  | 0.00  | 0.00  | 0.00  | 1.20  | 1.20  | 1.20  | 0.00 | 1.20  | 8.00  | 9.40  |
| Shennongjia2           | WAMX | 31.75 | 110.67 | 7.70  | 7.70  | 3.10  | 4.40  | 4.40  | 4.70  | 4.40  | 6.80  | 16.50 | 24.50 | 7.90 | 7.00  | 3.10  | 0.00  |
| Huguangyan Maar Lake B | TSFO | 21.15 | 110.28 | 18.30 | 20.20 | 9.30  | 0.00  | 0.00  | 0.90  | 0.00  | 1.70  | 6.50  | 17.80 | 2.90 | 8.50  | 8.20  | 0.80  |
| Yaoxian                | STEP | 35.93 | 110.17 | 0.00  | 0.00  | 0.00  | 1.10  | 1.10  | 1.10  | 1.10  | 1.10  | 1.10  | 1.10  | 1.10 | 10.10 | 12.30 | 12.30 |
| Jixian                 | STEP | 36.00 | 110.06 | 0.00  | 0.00  | 2.20  | 2.50  | 2.50  | 2.50  | 2.50  | 3.20  | 3.20  | 2.50  | 1.80 | 8.40  | 18.70 | 14.50 |

|                        |      |       |        |       |       |      |       |       |       |       |       |       |       |       |       |       |       |
|------------------------|------|-------|--------|-------|-------|------|-------|-------|-------|-------|-------|-------|-------|-------|-------|-------|-------|
| Shennongjia Dajiu Lake | TEDE | 31.49 | 110.00 | 7.50  | 9.10  | 3.90 | 4.50  | 4.50  | 9.60  | 4.50  | 13.80 | 25.20 | 24.70 | 4.50  | 5.10  | 3.80  | 0.30  |
| Qigainur               | DESE | 39.50 | 109.85 | 0.00  | 1.40  | 3.70 | 6.50  | 7.10  | 7.90  | 7.10  | 10.40 | 11.20 | 8.80  | 5.50  | 7.50  | 11.20 | 12.50 |
| Beizhuangcun           | STEP | 34.35 | 109.53 | 0.00  | 0.00  | 1.40 | 2.10  | 2.10  | 2.10  | 2.10  | 2.10  | 2.10  | 2.10  | 2.10  | 3.60  | 14.20 | 12.80 |
| Lantian                | STEP | 34.15 | 109.33 | 0.00  | 0.00  | 0.20 | 0.40  | 0.40  | 0.40  | 0.40  | 0.40  | 0.40  | 0.40  | 0.40  | 3.40  | 14.00 | 13.80 |
| Bahanniao              | COMX | 39.32 | 109.27 | 0.00  | 0.00  | 1.90 | 8.40  | 9.00  | 8.40  | 9.00  | 11.40 | 10.80 | 10.80 | 8.40  | 1.90  | 5.60  | 5.60  |
| Midiwan                | STEP | 37.65 | 108.62 | 0.00  | 0.00  | 0.00 | 2.30  | 3.00  | 2.30  | 3.00  | 3.90  | 3.20  | 2.30  | 1.40  | 7.70  | 15.00 | 13.10 |
| Jinbian                | STEP | 37.50 | 108.33 | 1.90  | 3.70  | 1.90 | 0.00  | 0.00  | 0.00  | 0.00  | 1.90  | 1.90  | 1.90  | 0.00  | 1.90  | 13.50 | 13.50 |
| Xindian                | STEP | 34.38 | 107.80 | 2.00  | 3.30  | 4.70 | 3.00  | 5.30  | 8.50  | 9.50  | 12.50 | 11.60 | 8.00  | 3.00  | 8.00  | 16.90 | 12.10 |
| Nanguanzhuang          | STEP | 34.43 | 107.75 | 4.20  | 8.40  | 8.20 | 4.00  | 4.00  | 4.00  | 4.00  | 15.20 | 15.20 | 15.20 | 4.00  | 15.40 | 18.40 | 10.40 |
| Xifeng                 | TEDE | 35.65 | 107.68 | 1.00  | 1.00  | 2.70 | 9.50  | 9.50  | 9.50  | 9.50  | 12.70 | 14.40 | 12.20 | 6.70  | 10.80 | 12.00 | 9.30  |
| Jiyuan                 | DESE | 37.13 | 107.40 | 2.40  | 4.70  | 2.40 | 0.00  | 0.00  | 0.00  | 0.00  | 2.40  | 2.40  | 2.40  | 0.00  | 2.40  | 14.30 | 16.10 |
| Jiacunyuan             | STEP | 34.27 | 106.97 | 0.00  | 0.00  | 0.00 | 2.30  | 2.30  | 2.30  | 2.30  | 4.50  | 4.50  | 4.50  | 2.30  | 1.90  | 15.90 | 11.00 |
| Dadiwan                | STEP | 35.01 | 105.91 | 0.80  | 3.30  | 7.40 | 4.30  | 4.30  | 7.60  | 5.10  | 8.80  | 11.30 | 8.30  | 3.70  | 10.10 | 15.30 | 10.20 |
| Maying                 | COMX | 35.34 | 104.99 | 1.20  | 1.20  | 2.00 | 6.90  | 8.80  | 8.00  | 10.00 | 10.90 | 9.70  | 9.70  | 6.90  | 7.10  | 10.60 | 10.00 |
| Huiningxiaogou         | COMX | 36.10 | 104.90 | 1.40  | 1.40  | 0.00 | 6.80  | 14.70 | 12.20 | 20.00 | 20.80 | 13.00 | 9.00  | 6.80  | 1.30  | 5.10  | 4.50  |
| Sujiawan               | COMX | 35.54 | 104.52 | 1.30  | 2.20  | 3.40 | 7.50  | 9.80  | 9.70  | 11.00 | 12.00 | 11.60 | 10.70 | 7.50  | 6.00  | 8.40  | 6.00  |
| QTH02                  | STEP | 39.07 | 103.61 | 0.00  | 0.00  | 1.40 | 2.40  | 2.40  | 2.40  | 2.40  | 3.00  | 3.00  | 3.00  | 2.40  | 6.90  | 18.20 | 17.40 |
| Laotanfang             | STEP | 26.10 | 103.20 | 1.20  | 2.40  | 6.90 | 6.40  | 6.40  | 6.40  | 6.40  | 7.60  | 7.60  | 7.60  | 6.40  | 7.80  | 12.10 | 5.50  |
| Hongshui River2        | STEP | 38.17 | 102.76 | 0.10  | 0.10  | 2.50 | 5.10  | 10.50 | 6.00  | 10.50 | 13.40 | 8.90  | 8.00  | 4.30  | 7.60  | 14.10 | 11.90 |
| Ruoergai               | STEP | 33.77 | 102.55 | 0.00  | 0.00  | 1.70 | 4.30  | 7.40  | 7.40  | 10.50 | 10.50 | 7.40  | 4.30  | 4.30  | 9.20  | 12.40 | 11.90 |
| Hongyuan               | TAIG | 32.78 | 102.52 | 0.00  | 0.00  | 0.60 | 5.50  | 10.90 | 5.50  | 10.90 | 10.90 | 5.50  | 5.50  | 5.50  | 5.40  | 8.80  | 9.90  |
| Dahaizi                | TEDE | 27.50 | 102.33 | 9.40  | 11.60 | 2.20 | 8.90  | 10.90 | 15.70 | 15.70 | 21.40 | 22.20 | 21.90 | 6.00  | 1.70  | 0.00  | 0.00  |
| Shayema Lake           | TEDE | 28.58 | 102.22 | 9.90  | 12.20 | 3.40 | 9.70  | 10.70 | 15.60 | 14.20 | 18.70 | 20.10 | 19.60 | 11.50 | 3.30  | 1.10  | 0.00  |
| Luanhaizi              | COMX | 37.59 | 101.35 | 0.00  | 0.00  | 2.50 | 5.40  | 9.20  | 5.40  | 9.20  | 13.20 | 9.40  | 5.40  | 1.40  | 9.80  | 10.60 | 8.10  |
| Lugu Lake              | WAMX | 27.68 | 100.80 | 4.60  | 5.50  | 1.70 | 8.70  | 9.40  | 11.60 | 11.40 | 18.40 | 18.60 | 19.00 | 10.70 | 2.60  | 4.30  | 0.40  |
| Qinghai Lake           | STEP | 36.93 | 100.73 | 0.00  | 0.00  | 2.10 | 6.40  | 8.80  | 6.40  | 8.80  | 10.80 | 8.40  | 6.40  | 4.40  | 6.00  | 12.10 | 10.00 |
| Dalianhai              | STEP | 36.25 | 100.41 | 0.00  | 0.00  | 3.60 | 3.60  | 8.10  | 3.60  | 8.10  | 9.70  | 6.40  | 4.90  | 2.10  | 8.20  | 14.80 | 14.20 |
| Erhai ES Core          | WAMX | 25.78 | 100.19 | 13.90 | 18.70 | 6.30 | 6.30  | 6.30  | 10.60 | 9.90  | 12.60 | 13.30 | 22.00 | 8.80  | 2.80  | 2.80  | 1.40  |
| Xianmachi profile      | TEDE | 25.97 | 99.87  | 4.50  | 11.40 | 6.80 | 12.50 | 12.90 | 25.70 | 17.40 | 27.30 | 35.80 | 19.10 | 4.50  | 1.20  | 0.00  | 0.00  |
| TCK1                   | COMX | 26.63 | 99.72  | 8.40  | 8.40  | 1.10 | 7.30  | 10.40 | 12.00 | 15.10 | 19.80 | 17.20 | 19.50 | 8.80  | 3.30  | 3.60  | 1.10  |
| Yidun Lake             | COMX | 30.30 | 99.55  | 0.00  | 0.00  | 2.30 | 8.70  | 11.30 | 10.00 | 12.60 | 20.20 | 17.60 | 12.90 | 5.20  | 9.20  | 6.30  | 3.60  |
| Kuhai lake             | STEP | 35.30 | 99.20  | 0.00  | 0.00  | 4.30 | 0.00  | 0.00  | 0.00  | 0.00  | 0.00  | 0.00  | 0.00  | 0.00  | 9.50  | 16.00 | 9.70  |
| Koucha lake            | TUND | 34.00 | 97.20  | 0.00  | 0.90  | 4.50 | 2.20  | 2.20  | 3.10  | 2.20  | 4.40  | 5.30  | 2.20  | 0.00  | 13.20 | 12.50 | 6.60  |
| Hurleg                 | STEP | 37.28 | 96.90  | 0.00  | 0.00  | 5.50 | 0.00  | 0.00  | 0.00  | 0.00  | 0.00  | 0.00  | 0.00  | 0.00  | 5.50  | 16.20 | 11.40 |
| Basu                   | COMX | 30.72 | 96.67  | 0.00  | 0.00  | 2.60 | 7.00  | 9.90  | 8.60  | 11.60 | 16.20 | 13.30 | 7.00  | 2.40  | 11.70 | 8.00  | 5.40  |



|               |      |       |       |      |      |      |      |      |      |      |      |      |      |      |       |       |       |
|---------------|------|-------|-------|------|------|------|------|------|------|------|------|------|------|------|-------|-------|-------|
| Tuolekule     | STEP | 43.34 | 94.21 | 0.00 | 0.00 | 5.50 | 0.00 | 0.00 | 0.00 | 0.00 | 0.00 | 0.00 | 0.00 | 0.00 | 8.00  | 15.70 | 11.60 |
| Balikun       | STEP | 43.62 | 92.77 | 0.00 | 0.00 | 3.00 | 2.30 | 2.30 | 2.30 | 2.30 | 4.60 | 4.60 | 2.30 | 0.00 | 10.00 | 16.60 | 13.80 |
| Cuona         | TUND | 31.47 | 91.51 | 0.70 | 1.30 | 5.60 | 0.80 | 0.80 | 0.80 | 0.80 | 2.20 | 2.20 | 1.50 | 0.00 | 13.90 | 12.70 | 5.50  |
| Dongdaohaizi2 | DESE | 44.64 | 87.58 | 0.00 | 0.00 | 3.10 | 0.00 | 1.60 | 0.00 | 1.60 | 1.60 | 0.00 | 0.00 | 0.00 | 6.80  | 16.60 | 19.90 |
| Bositeng Lake | STEP | 41.96 | 87.21 | 0.00 | 0.00 | 3.90 | 0.60 | 0.60 | 0.60 | 0.60 | 1.20 | 1.20 | 0.60 | 0.00 | 5.20  | 15.30 | 14.70 |
| Cuoqin        | TUND | 31.00 | 85.00 | 0.00 | 0.00 | 2.40 | 5.50 | 5.50 | 5.50 | 5.50 | 7.50 | 7.50 | 6.10 | 4.20 | 11.30 | 7.10  | 4.00  |
| Yili          | STEP | 43.86 | 81.97 | 0.60 | 1.30 | 3.30 | 1.50 | 1.50 | 1.50 | 1.50 | 3.70 | 3.70 | 2.20 | 0.00 | 8.80  | 20.00 | 15.20 |
| Bangong Lake  | STEP | 33.75 | 78.67 | 0.00 | 0.00 | 4.40 | 0.00 | 0.00 | 0.00 | 0.00 | 0.00 | 0.00 | 0.00 | 0.00 | 7.70  | 14.10 | 10.70 |

**Table S5. Climate change during mid-Holocene derived from IVM at each pollen site**

| Site              | Biome | AnnT1 | AnnT | AnnT2 | AnnP1 | AnnP | AnnP2 | MTCO1 | MTCO | MTCO2 | MTWAI | MTWA | MTWA2 | Pjan1 | Pjan | Pjan2 | Pjul1 | Pjul | Pjul2 |
|-------------------|-------|-------|------|-------|-------|------|-------|-------|------|-------|-------|------|-------|-------|------|-------|-------|------|-------|
| Sujiawan          | COMX  | -6    | -3.6 | -1.1  | -131  | 152  | 332   | -8.6  | -4   | 1.9   | -5.6  | -3.4 | -0.3  | -81   | 18.5 | 99.8  | -47   | 36.3 | 94    |
| Xiaogou           | COMX  | -5.5  | -2.8 | -1.2  | 3.1   | 169  | 358   | -7.8  | -1.4 | 2.7   | -5.5  | -3.7 | -1.2  | -79   | 20.4 | 91.8  | 1.5   | 44.7 | 96.3  |
| Dadiwan           | STEP  | -3.3  | -0.5 | 1.9   | -105  | 210  | 450   | -0.4  | 4.6  | 6.6   | -8.1  | -4   | 0.5   | -86   | 5.3  | 85    | -20   | 40.2 | 94.7  |
| Sanjiaocheng      | DESE  | -7.6  | -3   | -1    | 135   | -99  | 848   | -9.8  | 0.1  | -3    | -9.6  | -5.1 | 1.5   | -80   | 13.5 | 98    | 0     | -99  | 90.1  |
| Chadianpo         | TEDE  | -8.5  | -3.1 | -5.1  | -150  | 347  | 438   | -9.9  | -0.8 | -0    | -9.6  | -4.7 | -6.2  | -76   | 5.3  | 99.6  | -39   | 71.6 | 78.2  |
| Qindeli           | COMX  | -3.3  | 2.9  | 1     | -399  | 287  | 1361  | -5.5  | 7.5  | 1.7   | -2.8  | 0.3  | 2.8   | -77   | 18.8 | 80.6  | -30   | 47.4 | 97.1  |
| Fuyuanhuangye     | TEDE  | -9.1  | 6    | -2.1  | -181  | 312  | 296   | -9.7  | 6.9  | 1.1   | -9.8  | 5.5  | -2.7  | -86   | 1.4  | 97.4  | -62   | 54.2 | 98.8  |
| Jingbo Lake       | TEDE  | -6.8  | 4.2  | 1.2   | -26.3 | 362  | 397   | -9.9  | 6    | 7.3   | -6.1  | 3.1  | -1.5  | -178  | 25.8 | 198   | -32   | 73.1 | 191   |
| Hani Lake         | TEDE  | -7.6  | 4.7  | 1.4   | -139  | 295  | -26   | -7.9  | 5.8  | 8.2   | -9.8  | 4    | 0.3   | -164  | 26.6 | 199   | -179  | 39.9 | -17   |
| Jinchuan          | TEDE  | -7.2  | 4.4  | -0.3  | 237.5 | 361  | 441   | -9.9  | 5.3  | 6.2   | -9.5  | 3.8  | 0     | -56   | 16   | 96.2  | 44.1  | 53.1 | 98.2  |
| Maar Lake         | TEDE  | 2.2   | 4.7  | 4.4   | 0     | 388  | 622   | 5.6   | 6.6  | 9.6   | -1.3  | 3.5  | 2     | -59   | 17.2 | 90    | 0     | 53.6 | 99.9  |
| Maar Lake         | TEDE  | 3.1   | 4.6  | 8.8   | 156.5 | 387  | 486   | 4.1   | 6.6  | 8.2   | 1.4   | 3.5  | 9.1   | -75   | 13.3 | 99.6  | 32.1  | 53.3 | 98.6  |
| Xie Lake SO4      | WAMX  | 1.9   | -1   | 7.7   | 253.3 | 363  | 491   | 2     | -1.6 | 9.6   | -0.2  | -0.7 | 8.7   | -53   | 10.9 | 93.9  | 51.4  | 64.3 | 99.6  |
| Nanhuiheming Core | WAMX  | 1.3   | 1.8  | 7.1   | -98.9 | 472  | 651   | 2.2   | 1.3  | 8.5   | 0     | 2.2  | 6.5   | -89   | -0.6 | 89.6  | -18   | 43.5 | 95.2  |
| Toushe            | WAMX  | 1.1   | -2.1 | 7.2   | 17.9  | 963  | 560   | 2.5   | -3.9 | 8.4   | -0.4  | -1.1 | 7.5   | -86   | -6.5 | 97    | 13.9  | 13.7 | 86.3  |
| Dongyuan Lake     | WAMX  | 2.4   | 3.1  | 7.3   | 66.9  | -159 | 692   | 4.8   | 4.1  | 9     | 0     | 2.5  | 6.9   | -85   | 8.7  | 89.6  | 4.9   | -8.4 | 89.9  |
| Yonglong CY       | WAMX  | 2.3   | 1    | 7.3   | 68.7  | 353  | 690   | 4.7   | 2.3  | 9     | -0.1  | 0.2  | 6.9   | -72   | 9.2  | 92.5  | 5.2   | 38.4 | 91.6  |

|                   |      |      |      |     |       |      |      |      |      |     |      |      |      |      |       |      |      |      |      |
|-------------------|------|------|------|-----|-------|------|------|------|------|-----|------|------|------|------|-------|------|------|------|------|
| Hangzhou HZ3      | TEDE | -4.4 | -4.4 | 2.5 | 209.4 | 487  | 549  | -8.3 | -7.7 | 6.6 | -5.5 | -2.6 | 3.1  | -81  | 6.6   | 99.2 | 39.9 | 43.7 | 92.2 |
| Xinhua XH1        | WAMX | -2.8 | 1.7  | 6.1 | -14.2 | 408  | 1054 | -3.4 | 4.4  | 7.5 | -3.2 | 0    | 7.9  | -75  | 20.2  | 97.7 | -18  | 59.3 | 98.6 |
| ZK01              | WAMX | -5.4 | 2.5  | 2.2 | -437  | 428  | 2847 | -6.9 | 2.2  | 0   | -6.8 | 2.6  | 6.4  | -78  | 17.8  | 96   | -43  | 46.5 | 89.7 |
| Chifeng           | TEDE | -0.4 | 1    | 5.6 | -1704 | -67  | 2642 | -0.1 | 7.5  | 6   | -1.3 | -2.8 | 5.3  | -48  | 25    | 77.9 | -63  | -20  | 67.6 |
| SZK1              | WAMX | -3.1 | -2.3 | 4.3 | -50.2 | 396  | 770  | -1.6 | -2.8 | 7.1 | -4.6 | -2   | 5.1  | -84  | 11.4  | 97.6 | -14  | 32.9 | 91   |
| Gucheng           | WAMX | -9.3 | 1.8  | 0.3 | 36.5  | 530  | 1126 | -9.7 | 2.4  | -4  | -9.7 | 1.5  | 3.4  | -82  | 12.8  | 95.7 | -14  | 50.4 | 97.4 |
| Lulong            | TEDE | -1.6 | -1.3 | 4.2 | 174.1 | 361  | 613  | 0    | 1.1  | 8.3 | -3.9 | -2.7 | 6    | -83  | -4    | 95.5 | 0    | 68.7 | 89.1 |
| Hulun Lake        | STEP | -1   | 6.6  | 6   | -199  | 128  | 990  | -1.4 | 5.8  | 4.9 | -3.9 | 7.1  | 7.9  | -90  | 13    | 97.2 | -43  | 51.5 | 97.7 |
| CH-1              | WAMX | 1    | 1.9  | 1   | -67   | 430  | -67  | 7.5  | 2.5  | 7.5 | -2.8 | 1.6  | -2.8 | -2.1 | -2.1  | -2.1 | -20  | 46.8 | -20  |
| Sanyi profile     | STEP | -5.8 | 5.5  | 1   | -211  | 184  | 1260 | -9.5 | 1.9  | 2.5 | -5.4 | 7.6  | 1.6  | -87  | 8.2   | 97.8 | -34  | 64   | 93.3 |
| Xiaoniuchang      | COMX | -2.9 | 1.8  | 6.5 | 0     | 203  | 927  | -1.7 | 6.3  | 5.4 | -4.4 | -0.9 | 7.7  | -83  | 22    | 90.6 | 7.2  | 56.3 | 98.3 |
| Haoluku           | COMX | -4.6 | 1.8  | 1.1 | 75.7  | 138  | 457  | -4.5 | 6.6  | 7.3 | -4.5 | -1   | 0.7  | -88  | 0.8   | 80.4 | 10.3 | 39.6 | 91.5 |
| Liuzhouwan        | COMX | 2.9  | 2.5  | 9   | 0     | 195  | 214  | 2    | 5.7  | 9.4 | 3.4  | 0.7  | 9.9  | -79  | 26.1  | 95.9 | 0    | 53.9 | 89.3 |
| Poyang Lake 103B  | WAMX | -2.9 | 1.9  | 6.2 | -57.6 | 303  | 928  | -1.8 | 0.8  | 8.7 | -4.5 | 2.5  | 7.6  | -88  | 6.4   | 99.5 | -21  | 20.9 | 97.5 |
| Baiyangdian       | TEDE | 1.5  | -2   | 7.5 | 39.7  | 262  | 273  | -3.2 | 0.4  | 8.4 | 4.6  | -3.4 | 9.1  | -90  | -0.1  | 84.7 | 10   | 41.9 | 98   |
| Bayanchagan       | TEDE | 1.3  | 2.9  | 2.6 | 92.6  | 176  | 320  | 4.3  | 4.5  | 9.1 | -1.9 | 1.9  | -0.1 | -79  | 16.7  | 90.1 | 16.1 | 45.4 | 99.6 |
| Huangjiapu        | STEP | 0    | 2.8  | 2.5 | -58.4 | 101  | 210  | 2.5  | -0.7 | 8.7 | -1.8 | 4.8  | 0    | -43  | 31.4  | 79.4 | -25  | 21.2 | 65.3 |
| Dingnan           | TSFO | 0    | 4.6  | 3.2 | 94.7  | 500  | 289  | 3.4  | 5.4  | 7.4 | -1.9 | 4.2  | 1.7  | -40  | 33.5  | 99.6 | 28.3 | 34   | 84.6 |
| Guang1            | STEP | -0.5 | 2.5  | 4.6 | -597  | 126  | 1300 | -5.8 | 1.9  | 4.7 | -1.9 | 2.8  | 5.9  | -73  | 14.2  | 99.3 | -71  | 27.3 | 100  |
| Angulinao         | COMX | -4.5 | 0.3  | 0.7 | 3.8   | 180  | 528  | -5.7 | 4    | 8.5 | -4.9 | -1.9 | -0.7 | -84  | 5.9   | 90.8 | 3.1  | 54.6 | 91.8 |
| Yangyuanxipu      | STEP | 2.9  | 1.6  | 2.9 | 175.5 | 132  | 176  | 4.5  | -1.8 | 4.5 | 1.9  | 3.6  | 1.9  | 21.1 | 21.1  | 21.1 | 45.4 | 34.1 | 45.4 |
| Shenzhen Sx07     | WAMX | -1   | -2.6 | 6.1 | -4    | 550  | 262  | -5.7 | -5.3 | 5.4 | -0.4 | -1   | 9.5  | -76  | 5.7   | 96.4 | -5.5 | 29.5 | 50.1 |
| GZ-2              | TSFO | 2    | 3    | 8.2 | -32.4 | 437  | 1075 | 0.5  | 3.6  | 9.2 | 0    | 2.6  | 8.5  | -60  | 18.1  | 69.2 | -28  | 36.6 | 95.2 |
| Daihai99a         | COMX | -2.7 | -0.7 | 6.5 | -97.2 | 212  | 384  | -5.5 | 3.9  | 9.7 | -3.9 | -3.5 | 9.4  | -86  | 5.3   | 98.2 | -26  | 67   | 88.7 |
| Daihai            | COMX | -1   | -1.1 | 2.5 | 86.1  | 161  | 333  | 1    | 3.9  | 7.5 | -3.5 | -4.2 | 0.5  | -79  | -5.7  | 91.2 | 25.4 | 50.1 | 99   |
| Sihenan profile   | STEP | -2   | 1.1  | 5.6 | -45.2 | 81.9 | 243  | -7.3 | 1.9  | 6.1 | 0    | 0.6  | 6.6  | -81  | 1.5   | 89.7 | -13  | 19.9 | 65.9 |
| Diaojiachaizi     | COMX | -6   | 2.5  | 2.3 | -495  | 225  | 1686 | -9.8 | 4.7  | 0   | -7.2 | 1.2  | 5.7  | -58  | 28.6  | 99.4 | -47  | 67.1 | 96.4 |
| Ganhaizi          | TEDE | 0    | 4.6  | 6.2 | -194  | 399  | 902  | -0.9 | 3.8  | 8.8 | -1.7 | 5.1  | 8.2  | -76  | -30.9 | 17   | -12  | 79.3 | 75.8 |
| Jiangling profile | WAMX | -2.6 | 1.1  | 1.5 | 93.6  | 413  | 289  | -0.7 | 3.8  | 7.8 | -5   | -0.7 | -1.2 | -87  | 7.4   | 92.1 | 27.7 | 43.9 | 91.4 |
| Helingeer         | DESE | -2.7 | -2.2 | 0.8 | -135  | -220 | 313  | 0    | -0.4 | 8.4 | -5   | -3.2 | -3.4 | -84  | 12    | 96.3 | -46  | -76  | 91.6 |
| Shennongjia2      | WAMX | -2.5 | 1.3  | 4.9 | -88.6 | 558  | 257  | -3.7 | -2   | 6.6 | -4   | 3.1  | 5.8  | -83  | -4.5  | 92.1 | -27  | 31.3 | 63.9 |

|                        |      |      |      |      |       |      |      |      |      |     |      |      |      |      |       |      |      |      |      |
|------------------------|------|------|------|------|-------|------|------|------|------|-----|------|------|------|------|-------|------|------|------|------|
| Huguangyan Maar Lake B | TSFO | 1.1  | 0.2  | 4.4  | 103.9 | 969  | 326  | 0    | 0.5  | 8.7 | -0.1 | 0.1  | 2.7  | -80  | 6.7   | 94.8 | 21.8 | 56.8 | 97   |
| Yaoxian                | STEP | 2.8  | -0.1 | 7.1  | 318.1 | -338 | 484  | -2.1 | 1.1  | 9.6 | 2.6  | -1   | 9.2  | -83  | 13.2  | 84.6 | 59.2 | -51  | 95.9 |
| Jixian                 | STEP | -3.2 | 2.8  | 5.2  | 35.9  | -38  | 795  | -0.7 | 0.3  | 8.3 | -7.4 | 4.2  | 5.2  | -82  | 11.9  | 95.4 | -14  | -7   | 98.3 |
| Shennongjia Dajiu Lake | TEDE | -7.8 | 1.2  | 1.7  | -274  | 365  | -177 | -8.3 | 0.2  | 8   | -7.6 | 1.7  | 1    | -88  | -6.7  | 95.6 | -90  | 18.8 | -56  |
| Qigainur               | DESE | -1.7 | -1.5 | 4.8  | -725  | -217 | 1782 | -9.8 | 2.4  | 6.5 | -2   | -4   | 9.7  | -89  | 10.1  | 97.8 | -52  | -76  | 99.6 |
| Beizhuangcun           | STEP | -4   | 1    | 3.3  | 108.2 | -44  | 1636 | -4.2 | -1   | 5.7 | -4.3 | 2.1  | 4.6  | -9.6 | 48.5  | 93.5 | 0    | -6.7 | 98.1 |
| Lantian                | STEP | -3.7 | 3.2  | 2.6  | -442  | -95  | -146 | -8.8 | 3.6  | 7.7 | -4.5 | 3    | 2    | -85  | 14.3  | 88.2 | -70  | -17  | -15  |
| Bahanniao              | COMX | -2.4 | -1.2 | 5.9  | -209  | -10  | 59.3 | -7.8 | 3.1  | 6.2 | 0    | -4   | 9    | -77  | 3.4   | 98.1 | -51  | -4   | 21.1 |
| Midiwan                | STEP | -2.6 | 3    | 5    | -776  | 109  | 1847 | -6.1 | -0.5 | 5.7 | -5.3 | 5    | 7.3  | -88  | 10.9  | 96.5 | -49  | 28.8 | 99.5 |
| Jinbian                | STEP | -6.7 | 1    | 1.7  | -263  | -141 | -144 | -3.1 | 1.3  | 7.1 | -9.6 | 0.8  | 0.6  | -86  | -8.7  | 78.6 | -89  | -28  | -56  |
| Xindian                | STEP | -4.3 | 1.9  | 4.9  | -164  | 58.8 | 96   | -7   | -1.4 | 6.8 | -3.2 | 3.8  | 8.4  | -90  | -5.3  | 97.1 | -43  | 11.7 | 24.6 |
| Nanguanzhuang          | STEP | -1.3 | 3.4  | 6.1  | -319  | 32.4 | 91.9 | -1.2 | 4    | 9.7 | -2.7 | 3    | 7.8  | -82  | 7.5   | 99.7 | -66  | 6.1  | 31.7 |
| Xifeng                 | TEDE | -4.1 | 2.1  | 1.2  | -158  | 380  | 258  | -3.3 | 4.7  | 8   | -6.2 | 0.4  | -2   | -87  | 1.9   | 87.1 | -69  | 65.1 | 94.3 |
| Jiyuan                 | DESE | -0.9 | 1.4  | 5.8  | -3.3  | -445 | 181  | -8.9 | 2.4  | 7.2 | 1.3  | 0.8  | 7.6  | -84  | -21.3 | 66.7 | -4.9 | -81  | 47.5 |
| Jiacunyu               | STEP | -2.3 | 4.6  | 3.1  | -256  | -252 | 35.6 | -7.5 | 3.8  | 7.2 | -2   | 5    | 2.9  | -84  | -2    | 86.9 | -66  | -31  | 6.7  |
| Dadiwan                | STEP | -3.5 | 0.6  | 6.8  | -119  | 354  | 226  | -9.6 | 1.3  | 5.1 | -2.7 | 0.1  | 9.5  | -87  | -0.2  | 95.2 | -34  | 67.7 | 48.8 |
| Maying                 | COMX | -1.5 | -2.9 | 6.9  | -179  | 118  | 174  | -2.3 | -2.9 | 8.8 | -2.3 | -2.9 | 7.5  | -83  | 1.7   | 99.3 | -42  | 25.4 | 42.6 |
| Huiningxiaogou         | COMX | -2.2 | -3.4 | 7    | 71.9  | 84.3 | 594  | 3.3  | -2.2 | 6.4 | -6   | -4.2 | 8.3  | -69  | 11    | 92.3 | 14.7 | 22.8 | 99.3 |
| Sujiawan               | COMX | -2.3 | -3.6 | 4.1  | -500  | 178  | -334 | -6.6 | -3.4 | 8.7 | -1.6 | -3.8 | 2.7  | -86  | -43.6 | 62.1 | -90  | 44.5 | -64  |
| QTH02                  | STEP | 0.7  | -1.7 | 7.8  | -408  | 186  | -86  | -1.6 | -1.9 | 9.6 | 0    | -1.6 | 9.6  | -88  | -20   | 66.7 | -77  | 145  | -13  |
| Laotanfang             | STEP | -2.2 | 4.1  | 3.3  | 139   | 125  | 526  | -6.9 | -1.1 | 8.2 | -4.2 | 7    | 4    | -88  | 9.2   | 93.7 | 21.7 | 123  | 94.4 |
| Hongshui River2        | STEP | -5.9 | 0.6  | -0.1 | -300  | 223  | 418  | -8.4 | 2    | 2.6 | -4.9 | -0.2 | 0    | -88  | 11.6  | 96.6 | -78  | 138  | 100  |
| Ruergai                | STEP | -5   | 4.7  | -1.4 | -223  | 106  | 332  | -5.9 | 1.9  | 3.9 | -5.7 | 6.3  | -2.2 | -87  | 7.4   | 95.9 | -72  | 26.1 | 98.3 |
| Hongyuan               | TAIG | -6.1 | -3   | -0.7 | 16.6  | -31  | 386  | -8.5 | -2.6 | 2.3 | -6.3 | -3.3 | -1.1 | -87  | 9.5   | 99.1 | 0.8  | -8.9 | 96.2 |
| Dahaizi                | TEDE | -4   | 3.4  | 1.1  | 72.1  | 261  | 257  | -5.7 | 6.1  | 2.4 | -4.3 | 1.9  | 0.6  | -150 | 6.9   | 200  | 65.7 | 73.5 | 194  |
| Shayema Lake           | TEDE | 0.2  | -0.5 | 6.6  | 62.6  | 331  | 178  | -9   | 1.5  | 6.5 | 5.1  | -1.7 | 9.9  | -174 | -1.8  | 151  | 62.8 | 69   | 189  |
| Luanhaizi              | COMX | -1.5 | 2.8  | 2.3  | 105.6 | 276  | 281  | -4.9 | 4    | 7.5 | -3.4 | 2    | 1.2  | -141 | 59.1  | 195  | 64.4 | 132  | 190  |
| Lugu Lake              | WAMX | 0.5  | 1    | 7.6  | -65.8 | 380  | 269  | -5.4 | 1    | 8.6 | 2.8  | 0.9  | 8.8  | -88  | 9.3   | 95   | -33  | 67.9 | 68.5 |
| Qinghai Lake           | STEP | -6.2 | 5.6  | -0.1 | -262  | 207  | 267  | -9.6 | 3.6  | 3.8 | -6   | 6.7  | -1.6 | -88  | 5.9   | 94.3 | -67  | 103  | 66.8 |
| Dalianhai              | STEP | 1.2  | 3.3  | 3.9  | 115.9 | 98   | 318  | 1.8  | 3.2  | 7.7 | 0.6  | 3.3  | 2.6  | -74  | 37.8  | 97.6 | 20.9 | 44   | 94.5 |
| Erhai ES Core          | WAMX | -2.5 | 4    | 0.9  | 112.9 | 540  | 438  | -1.9 | 3.9  | 4.2 | -4.1 | 4    | 0    | -23  | 18.4  | 94.6 | 16.9 | 39.7 | 97.8 |

|                   |      |      |      |      |       |      |      |      |      |     |      |      |      |      |       |      |      |      |      |
|-------------------|------|------|------|------|-------|------|------|------|------|-----|------|------|------|------|-------|------|------|------|------|
| Xianmachi profile | TEDE | 0.1  | 4.8  | 4.5  | -6.1  | 350  | 424  | -3.3 | 5.6  | 8.4 | 0.4  | 4.4  | 4    | -146 | 53.7  | 199  | -12  | 70.4 | 194  |
| TCKI              | COMX | -1.6 | 1.9  | 3.8  | 158.1 | 226  | 557  | -7.2 | -4.6 | 7.1 | -2.7 | 5.6  | 6.8  | -89  | -2.1  | 84.1 | 25.4 | 49   | 98.2 |
| Yidun Lake        | COMX | 3.4  | 3.6  | 7.4  | 137.2 | 214  | 319  | -1.7 | 0.5  | 9   | 3.4  | 5.4  | 8.6  | -178 | -41.5 | 136  | 65.1 | 53   | 169  |
| Kuhai lake        | STEP | 0.4  | 5.2  | 6    | -6.7  | 124  | 179  | -3.6 | 2.1  | 8.6 | -0.3 | 7.1  | 6.9  | -88  | -4.2  | 83.4 | -7.5 | 40.7 | 82.2 |
| Koucha lake       | TUND | 0.6  | -3.2 | 6.2  | -123  | 77.2 | 1221 | 0    | -2.4 | 8.8 | 0    | -3.6 | 9    | -61  | 24.4  | 98.6 | -14  | 19.6 | 99.6 |
| Hurleg            | STEP | 2.4  | 1.6  | 6.1  | 153.4 | 173  | 515  | 0.5  | 3.9  | 8.2 | 1.8  | 0.2  | 7.8  | -76  | 28.4  | 99.3 | 16.2 | 131  | 100  |
| Basu              | COMX | 0    | 3.6  | 4.1  | 0     | 20.6 | 420  | -7.1 | 0.1  | 0.6 | 3.7  | 5.6  | 8    | -88  | 8.6   | 89.7 | -1.6 | 5.8  | 84.5 |
| Tuolekule         | STEP | 0.7  | 2.6  | 5.1  | 16.1  | 169  | 313  | -5.5 | 4.1  | 5.2 | 2.8  | 1.7  | 8.3  | -81  | 12.4  | 91   | 8.1  | 138  | 92   |
| Balikun           | STEP | 2.1  | 1.3  | 7.5  | 5.4   | 167  | 264  | -3.4 | 2.7  | 9.5 | 2.9  | 0.4  | 9.4  | -77  | 4.5   | 93.3 | -1.4 | 132  | 85   |
| Cuona             | TUND | -5.5 | -4.4 | -0.3 | -205  | 236  | 353  | -8.6 | -3.5 | 3.3 | -4.9 | -4.9 | -2.7 | -83  | 3.1   | 96.5 | -61  | 56.9 | 90.3 |
| Dongdaohaizi2     | DESE | 0    | -3.5 | 3    | 17.3  | -67  | 243  | 0    | 0    | 7.4 | -0.5 | -5.7 | 1.4  | -150 | 7.4   | 199  | 0.7  | -82  | 178  |
| Bositeng Lake     | STEP | 1.2  | 0.5  | 5.8  | -264  | 176  | 285  | -4.3 | 5.2  | 5.5 | 3.3  | -2.3 | 8.2  | -86  | -3.7  | 99.4 | -67  | 82.1 | 70.3 |
| Cuoqin            | TUND | 1.1  | -3.9 | 4.3  | 88    | 1589 | 238  | 0.1  | -1.3 | 7.8 | -1.2 | -5.5 | 3.8  | -139 | 34.3  | 177  | 44.5 | 106  | 199  |
| Yili              | STEP | -1   | -0.9 | 3.7  | 107   | 152  | 220  | -3.2 | 3.5  | 7.2 | -2.7 | -3.5 | 3.7  | -132 | 37.4  | 198  | 75.5 | 95.6 | 180  |
| Bangong Lake      | STEP | -4.7 | 3.1  | -4.1 | 78    | 472  | 281  | -4.5 | -3   | -3  | -5   | 6.6  | -4.7 | 0    | 31.8  | 65.7 | 9.1  | 158  | 70.5 |
| Shengli           | TEDE | -7.2 | 6.3  | 0.2  | -115  | 314  | 29.1 | -7.9 | 7.3  | 7.2 | -9.8 | 5.8  | -1.7 | -179 | -5.5  | 200  | -179 | 53   | 40.4 |
| Qingdeli          | WAMX | -0.9 | 6.9  | 2    | 38    | 313  | 340  | 1.5  | 8.1  | 8.3 | -4   | 6.2  | -0.3 | -147 | 16    | 187  | 13.6 | 53.1 | 160  |
| Changbaishan      | TEDE | -5.5 | 3.3  | -1.6 | 1490  | 344  | 1690 | -5.5 | 5    | 4.3 | -6.3 | 2.3  | -4.3 | 50.5 | 126   | 194  | 23.7 | 48.8 | 188  |
| Liuhe             | COMX | -4   | 4.5  | 1.6  | 46.6  | 333  | 260  | -1.6 | 6.2  | 7.5 | -6.7 | 3.5  | 0    | -163 | -1.1  | 198  | 4.9  | 44.4 | 166  |
| Shuangyang        | TEDE | 1.5  | 3.7  | 3.9  | 422.7 | 387  | 508  | -4.6 | 5.1  | 0   | 4.3  | 2.8  | 7.6  | 597  | 717   | 782  | 32.7 | 63.2 | 303  |
| Xiaonan           | WAMX | 4.2  | 3.6  | 8.4  | -13.1 | 364  | 501  | 3.4  | 5.1  | 9.6 | 3.4  | 2.6  | 9    | -59  | 13.6  | 76.5 | -6   | 59.8 | 88.5 |
| Tailai            | STEP | 4.1  | 2.8  | 8.1  | 27.6  | 162  | 466  | 4.6  | -0.7 | 9.4 | 2.8  | 4.8  | 9    | -87  | 13.9  | 96   | -1.1 | 40.9 | 89.5 |
| Sheli             | STEP | 0.2  | 2.6  | 5.4  | 0     | 133  | 656  | 0.2  | -0.8 | 9.7 | -0.2 | 4.6  | 6.3  | -85  | -1.4  | 89.3 | -3.9 | 34.7 | 95.4 |
| Tongtu            | STEP | 1.5  | 1.3  | 6.5  | 0.4   | 149  | 632  | 4.6  | -1.2 | 9.8 | 0    | 2.8  | 6.9  | -66  | 24.4  | 93.3 | 0    | 37.8 | 92.3 |
| Yueyawan          | TEDE | 0    | -1.6 | 5.8  | 187.8 | 352  | 581  | 0.7  | -0.2 | 9.6 | -1.7 | -2.4 | 7.3  | -72  | 24.4  | 99.2 | 20.4 | 63.4 | 92   |
| Beiwangxu         | TEDE | 0    | -1.9 | 7.2  | 91.9  | 354  | 594  | 0.2  | -1.3 | 8.8 | -1.4 | -2.3 | 6.8  | -84  | 12.6  | 99.7 | 17.1 | 64.9 | 99.1 |
| East Tai Lake1    | WAMX | -1.2 | 2.9  | 6.9  | -67.5 | 475  | 402  | -7.7 | 0.6  | 9   | 0.8  | 4.1  | 8.2  | -88  | 8.4   | 99.2 | -24  | 47.5 | 98.3 |
| Suzhou            | WAMX | -1.6 | -0.8 | 5.9  | -109  | 178  | 371  | -9.8 | 0.2  | 7.7 | 0.2  | -1.4 | 9.1  | -89  | 4.7   | 98.1 | -30  | 15.8 | 91.3 |
| Sun-Moon Lake     | WAMX | -2.9 | -0.9 | 4.8  | -28   | 1008 | 318  | -9.8 | -2.7 | 6.7 | 0    | 0.1  | 4.8  | -76  | 19.5  | 95.9 | -15  | 28.8 | 78.4 |
| West Tai Lake     | WAMX | -4.3 | 2.7  | 1    | 190.5 | 603  | 596  | -6.7 | 1.2  | 7   | -5.5 | 3.6  | 1.1  | -75  | 25.8  | 99.3 | 22.4 | 57.9 | 99.6 |
| Changzhou         | WAMX | -6.1 | 1.6  | 1.5  | 165.3 | 315  | 578  | -9   | 2    | 8.1 | -5.6 | 1.4  | 1.5  | -75  | 15    | 98   | 24   | 30.7 | 99.4 |
| Dazeyin           | TEDE | 0    | -0.6 | 5.7  | 10.9  | 370  | 992  | -1.7 | 1.4  | 3.5 | 0.5  | -1.8 | 7.7  | -81  | 15.2  | 89.4 | -5.3 | 73.2 | 95.2 |

|                     |      |      |      |      |       |      |      |      |      |     |      |      |      |      |       |      |      |      |      |
|---------------------|------|------|------|------|-------|------|------|------|------|-----|------|------|------|------|-------|------|------|------|------|
| Hailaer             | STEP | -3.3 | 5.8  | 5.1  | -151  | 156  | 742  | -2.9 | 3.7  | 3.3 | -4.4 | 7    | 6.7  | -76  | 12.2  | 95.2 | -23  | 48.6 | 99.9 |
| Cangumiao           | TEDE | -4.3 | -0.3 | 3.7  | -73.3 | 384  | 2336 | -5.5 | 2.6  | 0.5 | -5   | -2   | 6.2  | -75  | 19.3  | 93.9 | -33  | 70.4 | 94.3 |
| Qianhuzhuang        | COMX | 0.1  | -3.5 | 4.9  | 203.9 | 296  | 1079 | -2.7 | 2.3  | 4.7 | 0    | -7   | 7.1  | -77  | 25.8  | 99.4 | -4.6 | 55.7 | 95.5 |
| Reshuitang          | STEP | -3.4 | 2.3  | 5.9  | -155  | 78.5 | 909  | -2.1 | 4.4  | 6.2 | -6.1 | 1.1  | 8.7  | -87  | 13.9  | 88.9 | -31  | 29.3 | 97   |
| Yangerzhuang        | TEDE | -3.7 | -1.8 | 1.9  | 84.4  | 381  | 524  | -5.1 | 0.8  | 8   | -4.4 | -3.4 | 1    | -70  | 13.7  | 96.5 | 10.2 | 67.7 | 99.6 |
| Mengcun             | COMX | 3.4  | -2.9 | 7.9  | 2.3   | 283  | 296  | -2   | -0.3 | 8.4 | 5.3  | -4.5 | 7.9  | -87  | 29.5  | 73.3 | 0    | 53.1 | 97.7 |
| Hanjiang-CH2        | WAMX | -3.2 | -3.6 | 2.9  | 105.2 | 294  | 558  | -4   | -4.9 | 7.6 | -4.3 | -2.8 | 2.5  | -88  | 19.3  | 97.1 | 18.2 | 18.7 | 99.7 |
| Hanjiang-SH6        | TRFO | -6   | 3.7  | -1.3 | 147.4 | 934  | 464  | -4.4 | 3.6  | 7.4 | -9.3 | 3.8  | -4.9 | -90  | 4     | 96   | 24.1 | 57.4 | 86.8 |
| Hanjiang-SH5        | WAMX | 0.6  | -4   | 4.3  | -18.6 | 346  | 179  | -3.3 | -4.6 | 9.1 | -0.9 | -3.6 | 3    | -84  | -5.2  | 69.5 | -14  | 20.9 | 69   |
| Hulun Lake          | STEP | -5.6 | 4.9  | 1    | 131.2 | 266  | 528  | -7.4 | 1.6  | 7.2 | -5.9 | 6.9  | -0.1 | -89  | 25.3  | 95.3 | 17.2 | 115  | 99.1 |
| Heitutang           | STEP | -5.4 | 3.2  | -1.3 | 103.9 | 112  | 492  | -6.8 | 0.7  | 5.7 | -8.1 | 4.6  | -0.8 | -88  | -5.5  | 97.7 | 22.3 | 31.9 | 92.8 |
| Zhujiang delta PK16 | WAMX | -6.4 | -4   | 0.2  | -905  | 410  | 1589 | -9.8 | -5.4 | -0  | -7.5 | -3.2 | 1.9  | -75  | 11.4  | 97.1 | -82  | 23.1 | 99.9 |
| Angulitun           | TAIG | 0    | -5   | 6.1  | 416.6 | 116  | 1285 | -1   | -2   | 8.6 | -0.2 | -6.9 | 7.8  | -16  | 38    | 84.7 | 20.7 | 36.1 | 97.4 |
| Bataigou            | STEP | -6.2 | 4.1  | -2.2 | -450  | 138  | 1281 | -7.9 | 0    | -2  | -7.3 | 6.5  | 0    | -84  | 17    | 89.8 | -56  | 42.4 | 95   |
| Dahewan             | STEP | 2.6  | 3.3  | 7.3  | 88    | 139  | 421  | -3.6 | -0.9 | 8.7 | 4.5  | 5.7  | 9    | -165 | 5.3   | 164  | 33.4 | 42.2 | 186  |
| Yutubao             | STEP | -0.8 | 3    | 6.6  | -50.5 | 173  | 318  | -9.8 | 0.3  | 9.1 | 0.6  | 4.6  | 9.5  | -88  | -3.2  | 84.1 | -17  | 54.5 | 96.5 |
| Zhujiang delta K5   | WAMX | -6.2 | -2.8 | -0.5 | -687  | 409  | 1410 | -9.8 | -5.4 | -1  | -7.6 | -1.2 | 0.7  | -62  | 17.9  | 95.2 | -55  | 27.9 | 95.5 |
| Da-7                | DESE | -7.1 | -0.8 | -3.2 | -80.4 | -246 | 295  | -7.7 | -0.8 | 2.4 | -8.6 | -0.8 | -4   | -85  | 3     | 96.2 | -26  | -78  | 95.8 |
| Hahai-1             | STEP | 0.6  | 3.3  | 6.9  | 44.7  | 183  | 223  | -8.1 | 1.4  | 8.7 | 3.3  | 4.4  | 9.4  | -77  | -6.7  | 88.4 | 8    | 57   | 75.3 |
| Wajianggou          | STEP | 0.7  | 1.7  | 6.2  | 0     | 84.5 | 314  | -7.1 | 1.9  | 6.9 | 2.6  | 1.6  | 8.9  | -80  | -0.9  | 92.1 | -1.9 | 25.9 | 93   |
| Shuidong Core A1    | TRFO | -0.8 | 1.6  | 6.1  | 47.2  | 784  | 256  | -7.1 | 0.9  | 7.3 | 1.8  | 2    | 7.6  | -88  | 17.7  | 85.8 | 10.3 | 41.5 | 93.2 |
| Dajahu              | TEDE | -6.4 | 1.2  | 1    | -441  | 536  | 1540 | -7   | 0.1  | -3  | -8.4 | 1.8  | 4.6  | -82  | -0.7  | 89.8 | -31  | 29.1 | 98.6 |
| Tianshuigou         | STEP | -6.2 | 2.3  | 2.5  | -280  | 81.6 | -193 | -9.9 | 1.2  | 8.2 | -4.1 | 2.9  | 1    | -85  | -6.3  | 91.5 | -90  | 17.2 | -64  |
| Mengjiawan          | DESE | 0.5  | -1.3 | 7    | 77.2  | -266 | 295  | -4.9 | 1.1  | 9   | 0.9  | -2.8 | 8.3  | -85  | -7    | 97.6 | 19   | -79  | 97.1 |
| Fuping BK13         | TEDE | -1.7 | -3   | 4.5  | -92   | 335  | 277  | -7.1 | -3   | 7.6 | -0.2 | -3   | 3    | -88  | 1.5   | 96.5 | -27  | 65   | 95.9 |
| Yaocun              | STEP | -2.9 | 1.8  | 4.5  | 0     | 36.5 | 1473 | -3.5 | 0.9  | 5.1 | -3.7 | 2.4  | 7.6  | -34  | 46    | 90   | -11  | 3.9  | 97   |
| Jinbian             | STEP | -2.4 | -0.4 | 4.8  | -721  | -51  | 1682 | -8   | 1.3  | 5.7 | -5   | -1.5 | 8.7  | -89  | 12.6  | 95.7 | -54  | -12  | 93.3 |
| Dishaogou           | DESE | -2.5 | -2.1 | 5.3  | -135  | -305 | 272  | -5.2 | 1.1  | 7.9 | -3   | -4.3 | 7    | -86  | -0.9  | 92.4 | -38  | -80  | 61.2 |
| Shuidonggou         | DESE | -4.2 | -2.7 | 1.7  | -285  | -221 | -221 | -4.6 | 0    | 8.2 | -6.9 | -4.5 | 0    | -45  | -15.8 | 63.5 | -85  | -77  | -73  |
| Jiuzhoutai          | TAIG | -6.2 | -5.1 | 0.8  | 189.2 | 105  | 476  | -8.8 | -1   | 4.7 | -6.7 | -7.8 | 1    | -76  | 12.3  | 98.6 | 30.7 | 26.5 | 97.3 |
| Luojishan           | WAMX | -2.7 | 3.7  | 6.5  | -71   | 268  | 163  | -4   | 6    | 5   | -2.9 | 2.4  | 9.5  | -52  | 18.8  | 86.7 | -27  | 77.9 | 40.7 |

|                 |      |      |      |      |       |      |      |      |      |     |      |      |      |      |       |      |      |      |      |
|-----------------|------|------|------|------|-------|------|------|------|------|-----|------|------|------|------|-------|------|------|------|------|
| RM-F            | COMX | -3.5 | 1.3  | 4    | -172  | 192  | 130  | -7   | -1.4 | 9.1 | -5.2 | 2.8  | 1.6  | -74  | 0.3   | 99.6 | -58  | 50.3 | 24.5 |
| Hongyuan        | TUND | -5.4 | -5.8 | 1.3  | -340  | 7.7  | -268 | -6.8 | -3.8 | 6.2 | -7.7 | -7   | 0.2  | -89  | -38.8 | 30.8 | -90  | 2.1  | -59  |
| Wasong          | COCO | -7.1 | -1   | 1.5  | -256  | 156  | -172 | -7.7 | -4.7 | 6.9 | -9.6 | 1.1  | 0.4  | -82  | -14.4 | 64.6 | -90  | 35.8 | -59  |
| Guhu Core 28    | COMX | -7.9 | -1   | -1.6 | -146  | 253  | 367  | -6.8 | -5.8 | 4.5 | -9.9 | 1.8  | -5.8 | -87  | 12.2  | 100  | -52  | 46.5 | 95   |
| Napahai Core 34 | COMX | 3.2  | 0.8  | 4.1  | 227.9 | 311  | 281  | 3.2  | -4   | 8.3 | 1.1  | 3.6  | 2.8  | -37  | 24.3  | 63.6 | 73.8 | 59.3 | 81   |
| Lop Nur         | DESE | -1.5 | -3   | 3.8  | -78.2 | -162 | 405  | -7.5 | 1.6  | 3.6 | 0.4  | -5.9 | 5.8  | -76  | -4.4  | 96   | -19  | -117 | 99.7 |
| Chaiwobao1      | DESE | -7.8 | -3.7 | -2.6 | -168  | -210 | 268  | -9.3 | -2.1 | 3.7 | -7.9 | -4.8 | -5.9 | -66  | -0.9  | 99.2 | -49  | -140 | 60.4 |
| Chaiwobao2      | DESE | -2.7 | -3.2 | 1.5  | -92.6 | -208 | 438  | -9.8 | -1   | 4.7 | -0.7 | -4.5 | 4.4  | -71  | 27.8  | 99.1 | -30  | -143 | 99.1 |
| Manasi          | DESE | -3.4 | -1.4 | 1.1  | -89.4 | -108 | 542  | -9.1 | 3    | -3  | -0.2 | -4   | 4.9  | -87  | 4.9   | 90   | -18  | -77  | 99.2 |
| Wuqia           | DESE | -1.5 | -3.8 | 3    | 0     | -109 | 479  | -7.7 | 0.3  | 0.1 | 0.3  | -6.4 | 6.2  | -73  | 36.2  | 94   | 0    | -146 | 97.6 |
| Madagou         | STEP | -5.9 | -3.5 | 0    | -194  | 239  | -106 | -3.8 | -1.2 | 6   | -9.7 | -4.9 | -2.2 | -175 | -9.5  | 188  | -178 | 225  | -44  |
| Tongyu          | STEP | -9.1 | 3.7  | 0.8  | -214  | 103  | -195 | -9.6 | 2.4  | 7.2 | -9.8 | 4.5  | 0.9  | -170 | -72.7 | 46.4 | -176 | 29.6 | -102 |
| Nanjing         | TEDE | -6.9 | -4.3 | 2.1  | -210  | 430  | -200 | -7.4 | -5.7 | 7.2 | -8.1 | -3.5 | 0.5  | -180 | -91.3 | 31.8 | -169 | 50   | -105 |
| Banpo           | COMX | -3.7 | -7.1 | 0.7  | -178  | 190  | -0.4 | -1.8 | -5.1 | 7.3 | -6.2 | -8.2 | -1.2 | -169 | -36.3 | 193  | -172 | 33.6 | 24.5 |
| QL-1            | COMX | -7.3 | -1   | -0.4 | -110  | 559  | -99  | -6   | -3   | 6.7 | -9.9 | 0.1  | -1.9 | -178 | -31.2 | 107  | -178 | 36.7 | -101 |
| Dalainu         | TAIG | -5.2 | -5.4 | -1.3 | 156.7 | 65.7 | 300  | -5.2 | -4   | 2.9 | -7.1 | -6.2 | -1.7 | -588 | 228   | 687  | -160 | 22   | 771  |
| Qinghai         | TAIG | 1    | -3   | 5.9  | -33.2 | 192  | 188  | -7.7 | -1.6 | 8.7 | 2.1  | -4   | 6.9  | -78  | 6.5   | 80.8 | -4.9 | 90   | 58.5 |

In this table, we give the biome type at 6 ka for each pollen site used in our study. From third column, all the climate values (AnnT, AnnP, MTCO, MTWA, Pjan and Pjul) represent the climate changes during mid-Holocene (MH), compared to preindustrial (PI). The units for temperature and precipitation anomaly (MH-PI) are K and mm, respectively. Besides the median values (AnnT, AnnP, MTCO, MTWA, Pjan and Pjul), we also show the values bias on data reconstruction by giving the median value (for instance, column named MTCO) and values indicating the 5% (MTCO1)-95% (MTCO2) uncertainty bands.

**Table S6. The simulated values for annual and seasonal temperature from each model**

| Model         | AnnT1 | AnnT2 | AnnT3 | AnnT4 | AnnT5 | MTCO1 | MTCO2 | MTCO3 | MTCO4 | MTCO5 | MTWA1 | MTWA2 | MTWA3 | MTWA4 | MTWA5 |
|---------------|-------|-------|-------|-------|-------|-------|-------|-------|-------|-------|-------|-------|-------|-------|-------|
| CCSM4         | -1.03 | -0.83 | -0.71 | -0.52 | -0.27 | -3.19 | -2.08 | -1.68 | -1.47 | -0.98 | -0.60 | 0.25  | 0.69  | 1.04  | 2.25  |
| CSIRO-Mk3-6-0 | -0.87 | -0.31 | -0.19 | -0.05 | 0.63  | -1.83 | -0.96 | -0.77 | -0.42 | 1.75  | -0.22 | 0.65  | 1.27  | 1.52  | 2.64  |
| FGOALS-s2     | -1.19 | -0.73 | -0.50 | -0.23 | 0.11  | -2.17 | -1.87 | -1.52 | -1.16 | -0.47 | -1.02 | -0.11 | 0.54  | 1.28  | 2.28  |
| HadGEM2-CC    | -0.69 | -0.33 | -0.10 | 0.12  | 0.34  | -4.16 | -1.78 | -1.47 | -1.19 | -0.19 | -0.37 | 1.09  | 1.41  | 2.21  | 3.59  |
| IPSL-CM5A-LR  | -0.79 | -0.38 | -0.13 | 0.03  | 0.40  | -1.57 | -1.10 | -1.01 | -0.82 | -0.30 | -0.67 | 0.19  | 1.11  | 1.64  | 2.58  |
| MPI-ESM-P     | -1.27 | -0.71 | -0.40 | -0.24 | 0.38  | -2.43 | -1.66 | -1.23 | -0.95 | -0.45 | -1.14 | 0.33  | 1.06  | 1.84  | 2.90  |
| BCC-CSM1-1    | -1.01 | -0.44 | -0.30 | -0.22 | 0.08  | -1.99 | -1.63 | -1.49 | -1.39 | -0.75 | -0.63 | 0.89  | 1.73  | 2.03  | 2.83  |

|                   |       |       |       |       |       |       |       |       |       |       |       |      |      |      |      |
|-------------------|-------|-------|-------|-------|-------|-------|-------|-------|-------|-------|-------|------|------|------|------|
| <b>CNRM-CM5</b>   | -0.42 | -0.18 | 0.16  | 0.33  | 1.77  | -1.58 | -1.09 | -0.71 | -0.41 | 1.28  | -0.27 | 0.73 | 1.48 | 2.00 | 3.12 |
| <b>FGOALS-g2</b>  | -1.97 | -1.20 | -0.98 | -0.70 | -0.36 | -2.89 | -2.45 | -2.31 | -1.99 | -0.84 | -1.50 | 0.15 | 0.72 | 1.22 | 1.95 |
| <b>GISS-E2-R</b>  | -1.25 | -0.44 | -0.31 | -0.17 | 0.20  | -1.66 | -1.06 | -0.79 | -0.59 | -0.16 | -0.50 | 0.54 | 0.76 | 1.03 | 1.66 |
| <b>HadGEM2-ES</b> | -0.34 | 0.16  | 0.54  | 0.76  | 1.30  | -3.80 | -1.26 | -0.70 | -0.20 | 0.95  | -0.14 | 1.50 | 2.14 | 2.67 | 4.40 |
| <b>MIROC-ESM</b>  | -1.95 | -0.89 | -0.62 | -0.41 | 0.41  | -3.23 | -2.12 | -1.59 | -1.22 | 0.36  | -0.86 | 0.23 | 0.89 | 1.48 | 3.23 |
| <b>MRI-CGCM3</b>  | -0.81 | -0.40 | -0.30 | -0.18 | 0.25  | -1.57 | -1.09 | -0.87 | -0.63 | 0.00  | -0.49 | 0.20 | 0.79 | 1.42 | 2.46 |

In this table, we give the simulated values of annual and seasonal temperature from each model used in our study. From second column, all the climate values represent the temperature changes during mid-Holocene (MH), compared to preindustrial (PI). The units for temperature anomaly (MH-PI) are K. Besides the median values (AnnT3, MTCO3, MTWA3), we also give the values indicating the 5% (for instance, column named AnnT1)-95% (AnnT5) uncertainty bands and the 25% (AnnT2)-75% (AnnT4) range.

**Table S7. The simulated values for annual and seasonal precipitation from each model**

| <b>Model</b>         | <b>Pann 1</b> | <b>Pann 2</b> | <b>Pann 3</b> | <b>Pann 4</b> | <b>Pann 5</b> | <b>Pjan 1</b> | <b>Pjan 2</b> | <b>Pjan 3</b> | <b>Pjan 4</b> | <b>Pjan 5</b> | <b>Pjul 1</b> | <b>Pjul 2</b> | <b>Pjul 3</b> | <b>Pjul 4</b> | <b>Pjul 5</b> |
|----------------------|---------------|---------------|---------------|---------------|---------------|---------------|---------------|---------------|---------------|---------------|---------------|---------------|---------------|---------------|---------------|
| <b>CCSM4</b>         | -204.01       | -46.87        | 10.15         | 48.78         | 138.92        | -17.12        | -3.59         | -1.46         | -0.60         | 5.30          | -44.26        | -5.84         | 2.70          | 20.00         | 82.60         |
| <b>CSIRO-Mk3-6-0</b> | -107.21       | -28.55        | 15.73         | 52.74         | 380.99        | -9.95         | -2.52         | -1.49         | -0.94         | 35.19         | -73.08        | -2.38         | 6.84          | 15.27         | 119.89        |
| <b>FGOALS-s2</b>     | -134.24       | -68.80        | 15.12         | 17.39         | 360.68        | -22.62        | -5.82         | -2.45         | -0.38         | 13.27         | -18.11        | -9.19         | -5.16         | 2.81          | 101.30        |
| <b>HadGEM2-CC</b>    | -221.65       | -87.05        | 1.04          | 19.15         | 232.56        | -22.48        | -4.15         | -1.19         | -0.36         | 7.13          | -79.19        | -2.98         | 4.87          | 11.03         | 60.38         |
| <b>IPSL-CM5A-LR</b>  | -91.01        | -22.32        | 32.40         | 63.72         | 256.82        | -13.89        | -4.65         | -2.33         | -1.34         | 15.93         | -37.12        | -3.69         | 9.98          | 25.68         | 87.66         |
| <b>MPI-ESM-P</b>     | -124.27       | -34.13        | 36.50         | 85.28         | 437.87        | -25.79        | -3.53         | -1.98         | -0.76         | 7.38          | -15.71        | -2.50         | 9.14          | 26.70         | 108.32        |
| <b>bcc-csm1-1</b>    | -213.30       | -75.17        | 9.65          | 37.55         | 466.31        | -13.22        | -7.12         | -4.41         | -2.91         | 0.84          | -39.00        | -14.22        | 0.73          | 16.30         | 137.07        |
| <b>CNRM-CM5</b>      | -222.98       | 0.68          | 46.08         | 75.46         | 239.51        | -29.39        | -3.89         | -2.05         | -0.46         | 16.90         | -26.96        | 1.84          | 12.48         | 18.59         | 75.68         |
| <b>FGOALS-g2</b>     | -160.31       | -33.88        | -25.12        | 54.86         | 236.81        | -7.97         | -4.02         | -2.64         | -2.24         | -0.75         | -38.20        | -4.65         | 7.13          | 16.64         | 71.05         |
| <b>GISS-E2-R</b>     | -406.26       | -2.95         | 9.47          | 34.02         | 515.95        | -33.84        | -3.35         | -1.22         | -0.31         | 13.38         | -34.13        | -2.22         | 7.29          | 15.98         | 122.65        |
| <b>HadGEM2-ES</b>    | -277.31       | -33.91        | 15.88         | 8.57          | 257.44        | -14.02        | -3.41         | -0.78         | -0.24         | 12.99         | -81.43        | -10.75        | -3.73         | 1.49          | 74.69         |
| <b>MIROC-ESM</b>     | -168.19       | -120.60       | -83.95        | -53.86        | 287.64        | -7.64         | -2.06         | -1.33         | -0.41         | 4.54          | -33.24        | -20.65        | -7.05         | -1.19         | 98.71         |
| <b>MRI-CGCM3</b>     | -214.27       | -1.58         | 28.76         | 65.02         | 369.04        | -27.30        | -5.98         | -1.49         | -0.38         | 1.65          | -25.30        | 9.66          | 15.82         | 27.42         | 113.69        |

In this table, we give the simulated values of annual and seasonal precipitation from each model used in our study. From second column, all the climate values represent the precipitation changes during mid-Holocene (MH), compared to preindustrial (PI). The units for precipitation anomaly (MH-PI) are mm. Besides the median values (AnnP3, Pjan3, Pjul3), we also give the values indicating the 5% (for instance, column named AnnP1)-95% (AnnP5) uncertainty bands and the 25% (AnnP2)-75% (AnnP4) range.

**Table S8. Vegetation setting for the mid-Holocene among models in PMIP3**

| <i>Model</i>                | <i>LAI</i> | <i>Stomatal Resistance Function Of</i>                     | <i>Vegetation Time Variation</i>     |
|-----------------------------|------------|------------------------------------------------------------|--------------------------------------|
| <b><i>CCSM4</i></b>         | Prognostic | CO <sub>2</sub>   Light   Temperature   Water availability | Prescribed (varying from parameters) |
| <b><i>MIROC-ESM</i></b>     | Prescribed | CO <sub>2</sub>   Light   Temperature   Water availability | Prescribed (varying from parameters) |
| <b><i>BCC-CSM1.1</i></b>    | Prognostic | CO <sub>2</sub>   Light   Temperature   Water availability | Prescribed (varying from parameters) |
| <b><i>CNRM-CM5</i></b>      | Prescribed | Light   Temperature   Water availability                   | Fixed (not varying)                  |
| <b><i>CSIRO-MK3.6.0</i></b> | Prescribed | Light   Temperature   Water availability                   | Prescribed (varying from parameters) |
| <b><i>GISS-E2-R</i></b>     | Prescribed | CO <sub>2</sub>   Light   Temperature   Water availability | Fixed (not varying)                  |
| <b><i>IPSL-CM5A-LR</i></b>  | Prognostic | CO <sub>2</sub>   Light   Temperature   Water availability | Prescribed (varying from parameters) |
| <b><i>MPI-ESM-P</i></b>     | Prognostic | CO <sub>2</sub>   Water availability                       | Fixed (not varying)                  |
| <b><i>MRI-CGCM3</i></b>     | Prescribed | CO <sub>2</sub>   Light   Water availability               | Prescribed (varying from parameters) |
| <b><i>HadGEM2-ES</i></b>    | Prognostic | CO <sub>2</sub>   Light   Temperature   Water availability | Dynamical (varying from simulation)  |
| <b><i>HadGEM2-CC</i></b>    | Prognostic | CO <sub>2</sub>   Light   Temperature   Water availability | Dynamical (varying from simulation)  |
| <b><i>FGOALS-g2</i></b>     | Prescribed | no data                                                    | Prescribed (varying from parameters) |
| <b><i>FGOALS-s2</i></b>     | Prescribed | no data                                                    | Prescribed (varying from parameters) |



**Table S9. Previous reconstruction of temperature anomaly during mid-Holocene over China**

| <i>Site</i>         | <i>Lati</i> | <i>Long</i> | <i>Tann</i> | <i>Reference</i>      |
|---------------------|-------------|-------------|-------------|-----------------------|
| <i>Qingpu</i>       | 31.13       | 121.18      | -0.61       | Cai et al.,2001       |
| <i>Fanjingshan</i>  | 27.90       | 108.71      | 3.08        | Qiao et al.,1996      |
| <i>Daqingshan</i>   | 41.12       | 112.57      | -0.66       | Song and Sun,1997     |
| <i>Dajiuhu</i>      | 31.49       | 110.00      | 5.79        | Huang et al.,2013     |
| <i>Zhujiang</i>     | 22.70       | 113.50      | -0.49       | Zhao et al.,2014      |
| <i>Tangke</i>       | 33.45       | 108.92      | -0.40       | Guo et al.,2012       |
| <i>Shennongjia</i>  | 31.60       | 110.13      | 0.60        | Zhu et al.,2008       |
| <i>Dajiuhu2</i>     | 31.60       | 110.00      | 2.40        | Liu et al.,2000       |
| <i>Luanhaizi</i>    | 37.59       | 101.35      | 0.16        | Herzschuh et al.,2010 |
| <i>Ximencuo</i>     | 33.38       | 101.10      | 1.77        | Herzschuh et al.,2014 |
| <i>Bayanchagan</i>  | 41.65       | 115.21      | 0.20        | Jiang et al.,2010     |
| <i>Tianchi</i>      | 35.26       | 106.31      | -2.38       | Li et al.,2014        |
| <i>Chencuo Lake</i> | 28.93       | 90.60       | -1.92       | Lu et al.,2011        |
| <i>Koucha</i>       | 34.00       | 97.20       | 0.78        | Herzschuh et al.,2009 |
| <i>Qigai Nuur</i>   | 39.58       | 109.89      | -1.07       | Sun and Feng,2013     |
| <i>Chadianpo</i>    | 36.10       | 114.40      | -1.21       | Xu et al.,2010        |
| <i>Hulun</i>        | 48.93       | 117.35      | 0.12        | Wen et al.,2010       |
| <i>Daihai Lake</i>  | 40.55       | 112.66      | 0.59        | Xu et al.,2010        |
| <i>Hulun lake</i>   | 49.13       | 117.51      | 0.20        | Wen et al.,2010       |
| <i>Huiduipo</i>     | 34.57       | 109.02      | 1.10        | Sun et al.,2016       |
| <i>Weinan</i>       | 34.24       | 109.30      | 1.50        | Lu et al.,2007        |
| <i>Weinan</i>       | 34.24       | 109.30      | 2.50        | Wu et al.,1994        |
| <i>Zoige DC</i>     | 33.90       | 102.55      | warmer      | Liu et al.,1995       |
| <i>Renjiahutong</i> | 35.75       | 109.42      | warmer      | Zhou et al.,1994      |
| <i>Barkol Lake</i>  | 43.70       | 92.83       | warmer      | Xue and Zhong,2008    |
| <i>Bosten Lake</i>  | 42.08       | 87.05       | warmer      | Zhong and Shu,2001    |
| <i>Moon Lake</i>    | 47.51       | 120.87      | warmer      | Liu et al.,2014       |
| <i>Baiyangdian</i>  | 38.85       | 116.00      | warmer      | Xu et al.,2003        |
| <i>Erhai Lake</i>   | 25.78       | 100.19      | warmer      | Zhou et al.,2003      |
| <i>Hulu river</i>   | 35.00       | 106.00      | warmer      | Mo et al.,1996        |
| <i>Dongge cave</i>  | 25.28       | 108.08      | warmer      | Zhang et al.,2003     |
| <i>Xiangshui</i>    | 25.25       | 110.92      | warmer      | Zhang et al.,2003     |
| <i>Maohebei</i>     | 39.50       | 119.17      | warmer      | Li and Liang,1985     |
| <i>Daziying</i>     | 39.70       | 118.99      | warmer      | Li and Liang,1985     |
| <i>Hani</i>         | 42.23       | 126.52      | warmer      | Yu et al.,2008        |
| <i>Dagushan</i>     | 39.92       | 123.66      | warmer      | CQPD in IGCAS,1977    |
| <i>Mianyang</i>     | 30.20       | 113.22      | warmer      | Yang et al.,1995      |
| <i>Angulinao</i>    | 41.35       | 114.39      | warmer      | Zhai et al.,2000      |
| <i>Diaojiao</i>     | 41.30       | 112.35      | warmer      | Song et al.,1996      |
| <i>Poyang Lake</i>  | 29.03       | 116.14      | warmer      | Ma et al.,2004        |
| <i>Ritu</i>         | 33.39       | 79.73       | warmer      | Wang et al.,2010      |
| <i>Qinghai Lake</i> | 36.55       | 99.60       | warmer      | Kong et al.,1990      |
| <i>Hulun Lake</i>   | 48.90       | 116.50      | warmer      | Yang et al.,1995      |

|                     |       |        |        |                       |
|---------------------|-------|--------|--------|-----------------------|
| <i>Ulungur Lake</i> | 47.22 | 87.15  | warmer | Jiang et al.,2007     |
| <i>Tanghongling</i> | 48.35 | 129.67 | warmer | Yang and Wang,2002    |
| <i>Aibi Lake</i>    | 44.88 | 82.88  | warmer | Wu et al.,1996        |
| <i>Xianrendong</i>  | 25.83 | 103.50 | warmer | Zhang et al.,2009     |
| <i>Gushantun</i>    | 42.00 | 126.00 | warmer | Wang and Liu,2001     |
| <i>Changbaishan</i> | 42.00 | 128.00 | warmer | Zhao et al.,2002      |
| <i>Gonong Core</i>  | 34.63 | 92.15  | warmer | Li et al.,1995        |
| <i>Juyanze Lake</i> | 41.89 | 101.85 | colder | Herzschuh et al.,2004 |
| <i>Dadiwan</i>      | 35.01 | 105.91 | warmer | An et al.,2003        |
| <i>Sujiawan</i>     | 35.54 | 104.52 | warmer | An et al.,2003        |
| <i>Dahu</i>         | 24.68 | 115.00 | warmer | Xiao et al.,2007      |
| <i>Dingxi</i>       | 35.52 | 104.54 | warmer | Feng et al.,2005      |
| <i>Bangong Core</i> | 33.67 | 79.00  | warmer | Gasse et al.,1996     |
| <i>Sumxi Core</i>   | 34.62 | 81.03  | warmer | Gasse et al.,1991     |
| <i>Bayanchagan</i>  | 41.65 | 115.21 | warmer | Guiot et al.,2008     |
| <i>Zigetang</i>     | 32.00 | 90.90  | warmer | Herzschuh et al.,2006 |
| <i>Dahu</i>         | 24.25 | 115.03 | warmer | Zhou et al.,2004      |
| <i>Jingbo Lake</i>  | 43.90 | 128.80 | warmer | Li et al.,2011        |
| <i>Daihai Lake</i>  | 40.58 | 112.69 | warmer | Xiao et al.,2004      |
| <i>Naleng Lake</i>  | 31.10 | 99.75  | warmer | Kramer et al.,2010    |
| <i>Nam Co Lake</i>  | 30.84 | 90.90  | warmer | Li et al.,2008        |
| <i>Longzhong</i>    | 35.30 | 105.20 | warmer | Tang and An,2007      |
| <i>Shanbao cave</i> | 31.67 | 110.43 | warmer | Shao et al.,2006      |
| <i>Dongganchi</i>   | 39.53 | 115.78 | warmer | Zhang and Kong, 1999  |
| <i>KB</i>           | 40.40 | 110.00 | warmer | Sun et al.,2006       |
| <i>JJ</i>           | 38.50 | 109.60 | warmer | Sun et al.,2006       |
| <i>TYG</i>          | 39.00 | 110.12 | warmer | Sun et al.,2006       |
| <i>Balikun Lake</i> | 43.62 | 92.77  | warmer | Tao et al.,2010       |
| <i>Guliya</i>       | 35.28 | 81.48  | warmer | Thompson et al.,1997  |
| <i>Haoluku Lake</i> | 42.96 | 116.76 | warmer | Wang et al.,2001      |
| <i>Huguangyan</i>   | 21.15 | 110.28 | warmer | Wang et al.,2007      |
| <i>Zigê Tangcuo</i> | 32.08 | 90.84  | warmer | Wu et al.,2007        |
| <i>Badain Jaran</i> | 39.50 | 102.00 | warmer | Yang et al.,2010      |
| <i>Daihai Lake</i>  | 40.58 | 112.69 | warmer | Xu et al.,2010        |
| <i>SGDL</i>         | 42.69 | 115.95 | warmer | Zhou et al.,2008      |
| <i>303 Road</i>     | 43.69 | 116.64 | warmer | Zhou et al.,2008      |
| <i>LW</i>           | 41.41 | 114.97 | warmer | Zhou et al.,2008      |
| <i>207 Road</i>     | 43.18 | 116.14 | colder | Zhou et al.,2008      |
| <i>HSHN</i>         | 43.25 | 116.13 | warmer | Zhou et al.,2008      |
| <i>Baxie</i>        | 35.58 | 103.57 | warmer | Zhou et al.,1994      |
| <i>Baimapo</i>      | 34.17 | 109.32 | warmer | Zhou et al.,2008      |
| <i>Beizhuang</i>    | 34.50 | 109.50 | warmer | Zhou et al.,1994      |
| <i>Hanjiang</i>     | 23.48 | 116.68 | warmer | Zheng et al.,1990     |
| <i>Qingfeng</i>     | 33.45 | 119.92 | warmer | Zhao et al.,1994      |
| <i>Dunde</i>        | 38.10 | 96.42  | warmer | Wei and Lin,1994      |

|                     |       |        |        |                   |
|---------------------|-------|--------|--------|-------------------|
| <i>Erhai Lake</i>   | 25.78 | 100.19 | warmer | Zhang et al.,2000 |
| <i>Donghai</i>      | 30.95 | 121.87 | warmer | Zhang et al.,2006 |
| <i>Heqing Basin</i> | 26.77 | 100.21 | warmer | Jiang et al.,1998 |
| <i>Jiuzhoutai</i>   | 36.07 | 103.75 | warmer | Chen et al.,1991  |
| <i>Guliya</i>       | 35.28 | 81.48  | warmer | Yao et al.,1997   |
| <i>Hongshui</i>     | 38.18 | 102.76 | warmer | Zhang et al.,2000 |
| <i>Liuzhouwan</i>   | 42.71 | 116.68 | warmer | Wang et al.,2001  |
| <i>Weinan</i>       | 34.24 | 109.30 | warmer | Lu et al.,2007    |
| <i>Weinan</i>       | 34.24 | 109.30 | warmer | Wu et al.,1994    |

**Table S10. Previous reconstruction of precipitation anomaly during mid-Holocene over China**

| <i>Site</i>         | <i>Lati</i> | <i>Long</i> | <i>Pann</i> | <i>Reference</i>        |
|---------------------|-------------|-------------|-------------|-------------------------|
| <i>Qingdai</i>      | 31.13       | 121.18      | 46.40       | Cai et al.,2000         |
| <i>Daihai</i>       | 40.59       | 112.67      | 117.91      | Xu et al.,2003          |
| <i>Fanjingshan</i>  | 27.90       | 108.71      | -34.00      | Qiao et al.,1996        |
| <i>Daqingshan</i>   | 41.12       | 112.57      | 50.00       | Song and Sun,1997       |
| <i>Zhujiang</i>     | 22.70       | 113.50      | 70.00       | Zhao et al.,2014        |
| <i>Tangke</i>       | 33.45       | 108.92      | -5.68       | Guo et al.,2012         |
| <i>Caisuqi</i>      | 40.73       | 111.18      | 250.00      | Wang et al.,1998        |
| <i>Dajiuhu2</i>     | 31.60       | 110.00      | 239.00      | Liu et al.,2000         |
| <i>Gonghai</i>      | 38.90       | 112.23      | 195.00      | Chen et al., 2015       |
| <i>Xingyun Lake</i> | 24.34       | 102.78      | 267.00      | Chen et al., 2014       |
| <i>Luanhaizi</i>    | 37.59       | 101.35      | 45.20       | Herzschuh et al.,2010   |
| <i>Ximencuo</i>     | 33.38       | 101.10      | 18.75       | Herzschuh et al.,2014   |
| <i>Sihailong</i>    | 42.28       | 126.60      | -23.27      | Stebich et al.,2015     |
| <i>Bayanchagan</i>  | 41.65       | 115.21      | 156.97      | Jiang et al.,2010       |
| <i>Tianchi</i>      | 35.26       | 106.31      | 265.00      | Li et al.,2014          |
| <i>Chencuo Lake</i> | 28.93       | 90.60       | 10.86       | Lu et al.,2011          |
| <i>Hoton Nur</i>    | 48.62       | 88.35       | 195.40      | Rudaya et al.,2009      |
| <i>Koucha</i>       | 34.00       | 97.20       | -20.70      | Herzschuh et al.,2009   |
| <i>Yidun</i>        | 30.30       | 99.55       | 62.95       | Shen et al.,2006        |
| <i>Qigai Nuur</i>   | 39.58       | 109.89      | 15.23       | Sun and Feng,2013       |
| <i>Chadianpo</i>    | 36.10       | 114.40      | -17.95      | Xu et al.,2010          |
| <i>Donggeicuona</i> | 35.35       | 98.44       | -3.82       | Wang et al.,2014        |
| <i>Hulun</i>        | 48.93       | 117.35      | 17.46       | Wen et al.,2010         |
| <i>Daihai Lake</i>  | 40.55       | 112.66      | 152.00      | Xu et al.,2010          |
| <i>Kuhai</i>        | 35.30       | 99.20       | -23.87      | Wischnewski et al.,2011 |
| <i>Rencuo</i>       | 30.73       | 96.68       | 48.00       | Tang et al.,1998;2004   |
| <i>Hidden</i>       | 29.81       | 92.54       | 164.14      | Tang et al.,2004        |
| <i>Hulun Lake</i>   | 49.13       | 117.51      | 25.00       | Wen et al.,2010         |
| <i>Aibi Lake</i>    | 44.88       | 82.88       | 72.00       | Wu et al.,1996          |
| <i>Heshang cave</i> | 30.45       | 110.42      | 101.50      | Hu et al.,2008          |

|                     |       |        |        |                       |
|---------------------|-------|--------|--------|-----------------------|
| <i>Hidden</i>       | 29.81 | 92.54  | 141.00 | Tang et al.,2000      |
| <i>Ren cave</i>     | 30.73 | 96.68  | 159.00 | Tang et al.,2000      |
| <i>Huiduipo</i>     | 34.57 | 109.02 | 277.80 | Sun et al.,2016       |
| <i>Weinan</i>       | 34.24 | 109.30 | 125.00 | Lu et al.,2007        |
| <i>Weinan</i>       | 34.24 | 109.30 | 200.00 | Wu et al.,1994        |
| <i>Zoige DC</i>     | 33.90 | 102.55 | Wetter | Liu et al.,1995       |
| <i>Renjiahutong</i> | 35.75 | 109.42 | Wetter | Zhou et al.,1994      |
| <i>Barkol lake</i>  | 43.70 | 92.83  | Wetter | Xue and Zhong,2008    |
| <i>Bosten lake</i>  | 42.08 | 87.05  | Wetter | Zhong and Shu,2001    |
| <i>Moon lake</i>    | 47.51 | 120.87 | Wetter | Liu et al.,2014       |
| <i>Baiyangdian</i>  | 38.85 | 116.00 | Wetter | Xu et al.,2003        |
| <i>Erhai lake</i>   | 25.78 | 100.19 | Wetter | Zhou et al.,2003      |
| <i>Hulu river</i>   | 35.00 | 106.00 | Wetter | Mo et al.,1996        |
| <i>Dongge cave</i>  | 25.28 | 108.08 | Wetter | Zhang et al.,2003     |
| <i>Xiangshui</i>    | 25.25 | 110.92 | Wetter | Zhang et al.,2003     |
| <i>Maohebei</i>     | 39.50 | 119.17 | Wetter | Li and Liang,1985     |
| <i>Daziying</i>     | 39.70 | 118.99 | Wetter | Li and Liang,1985     |
| <i>Hani</i>         | 42.23 | 126.52 | Wetter | Yu et al.,2008        |
| <i>Dagushan</i>     | 39.92 | 123.66 | Wetter | CQPD in IGCAS,1977    |
| <i>Mianyang</i>     | 30.20 | 113.22 | Wetter | Yang et al.,1995      |
| <i>Angulinao</i>    | 41.35 | 114.39 | Wetter | Zhai et al.,2000      |
| <i>Diaojiao</i>     | 41.30 | 112.35 | Wetter | Song et al.,1996      |
| <i>Poyang lake</i>  | 29.03 | 116.14 | Wetter | Ma et al.,2004        |
| <i>Ritu</i>         | 33.39 | 79.73  | Wetter | Wang et al.,2010      |
| <i>Qinghai lake</i> | 36.55 | 99.60  | Wetter | Kong et al.,1990      |
| <i>Hulun lake</i>   | 48.90 | 116.50 | Wetter | Yang et al.,1995      |
| <i>Ulungur lake</i> | 47.22 | 87.15  | Wetter | Jiang et al.,2007     |
| <i>Tanghongling</i> | 48.35 | 129.67 | Wetter | Yang and Wang,2002    |
| <i>Aibi lake</i>    | 44.88 | 82.88  | Wetter | Wu et al.,1996        |
| <i>Xianrendong</i>  | 25.83 | 103.50 | Wetter | Zhang et al.,2009     |
| <i>Gushantun</i>    | 42.00 | 126.00 | Wetter | Wang and Liu,2001     |
| <i>Changbaishan</i> | 42.00 | 128.00 | Wetter | Zhao et al.,2002      |
| <i>Gonong Core</i>  | 34.63 | 92.15  | Wetter | Li et al.,1995        |
| <i>Juyanze lake</i> | 41.89 | 101.85 | drier  | Herzschuh et al.,2004 |
| <i>Dadiwan</i>      | 35.01 | 105.91 | Wetter | An et al.,2003        |
| <i>Sujiawan</i>     | 35.54 | 104.52 | Wetter | An et al.,2003        |
| <i>Yiema lake</i>   | 39.10 | 103.67 | Wetter | Chen et al.,1999      |
| <i>Dahu</i>         | 24.68 | 115.00 | Wetter | Xiao et al.,2007      |
| <i>Dingxi</i>       | 35.52 | 104.54 | Wetter | Feng et al.,2005      |
| <i>Bangong Core</i> | 33.67 | 79.00  | Wetter | Gasse et al.,1996     |
| <i>Sumxi Core</i>   | 34.62 | 81.03  | Wetter | Gasse et al.,1991     |
| <i>Bayanchagan</i>  | 41.65 | 115.21 | Wetter | Guiot et al.,2008     |
| <i>Zigetang</i>     | 32.00 | 90.90  | Wetter | Herzschuh et al.,2006 |
| <i>Dahu</i>         | 24.25 | 115.03 | Wetter | Zhou et al.,2004      |
| <i>Juyan lake</i>   | 41.80 | 101.80 | Wetter | Chen et al.,2008      |
| <i>Jingbo lake</i>  | 43.90 | 128.80 | Wetter | Li et al.l.,2011      |

|                     |       |        |        |                               |
|---------------------|-------|--------|--------|-------------------------------|
| <i>Daihαι lake</i>  | 40.58 | 112.69 | Wetter | Xiao et al.,2004              |
| <i>Heshang cave</i> | 30.45 | 110.42 | Wetter | Hu et al.,2008                |
| <i>Siling Core</i>  | 31.60 | 89.05  | Wetter | Kashiwaya et al.,1995         |
| <i>Naleng lake</i>  | 31.10 | 99.75  | Wetter | Kramer et al.,2010            |
| <i>Baahar Nuur</i>  | 39.10 | 109.20 | Wetter | Feng et al.,2005              |
| <i>Nam Co lake</i>  | 30.84 | 90.90  | Wetter | Li et al.,2008                |
| <i>Zhuyeze lake</i> | 39.17 | 104.16 | Wetter | Long et al.,2012              |
| <i>Qingtu lake</i>  | 39.05 | 103.67 | Wetter | Long et al.,2007,2010         |
| <i>Bosten lake</i>  | 41.95 | 86.78  | Wetter | Mischke and<br>Wunnemann,2006 |
| <i>Kouka lake</i>   | 34.01 | 97.24  | Wetter | Mischke et al.,2008           |
| <i>Wutonggou</i>    | 44.39 | 87.86  | Wetter | Li and Fan,2011               |
| <i>Longzhong</i>    | 35.30 | 105.20 | Wetter | Tang and An,2007              |
| <i>Manas lake</i>   | 45.75 | 86.00  | Wetter | Rhodes et al.,1996            |
| <i>Shanbao cave</i> | 31.67 | 110.43 | Wetter | Shao et al.,2006              |
| <i>Dongganchi</i>   | 39.53 | 115.78 | Wetter | Zhang and Kong, 1999          |
| <i>KB</i>           | 40.40 | 110.00 | Wetter | Sun et al.,2006               |
| <i>JJ</i>           | 38.50 | 109.60 | Wetter | Sun et al.,2006               |
| <i>TYG</i>          | 39.00 | 110.12 | Wetter | Sun et al.,2006               |
| <i>Balikun lake</i> | 43.62 | 92.77  | Wetter | Tao et al.,2010               |
| <i>Guliya</i>       | 35.28 | 81.48  | Wetter | Thompson et al.,1997          |
| <i>Haoluku lake</i> | 42.96 | 116.76 | Wetter | Wang et al.,2001              |
| <i>Huguangyan</i>   | 21.15 | 110.28 | Wetter | Wang et al.,2007              |
| <i>Zigē Tangcuo</i> | 32.08 | 90.84  | Wetter | Wu et al.,2007                |
| <i>Badain Jaran</i> | 39.50 | 102.00 | Wetter | Yang et al.,2010              |
| <i>Daihαι lake</i>  | 40.58 | 112.69 | Wetter | Xu et al.,2010                |
| <i>SGDL</i>         | 42.69 | 115.95 | Wetter | Zhou et al.,2008              |
| <i>303 Road</i>     | 43.69 | 116.64 | Wetter | Zhou et al.,2008              |
| <i>LW</i>           | 41.41 | 114.97 | Wetter | Zhou et al.,2008              |
| <i>207 road</i>     | 43.18 | 116.14 | drier  | Zhou et al.,2008              |
| <i>HSHN</i>         | 43.25 | 116.13 | Wetter | Zhou et al.,2008              |
| <i>Baxie</i>        | 35.58 | 103.57 | Wetter | Zhou et al.,1994              |
| <i>Baimapo</i>      | 34.17 | 109.32 | Wetter | Zhou et al.,2008              |
| <i>Beizhuang</i>    | 34.50 | 109.50 | Wetter | Zhou et al.,1994              |
| <i>Hanjiang</i>     | 23.48 | 116.68 | Wetter | Zheng et al.,1990             |
| <i>Qingfeng</i>     | 33.45 | 119.92 | Wetter | Zhao et al.,1994              |
| <i>Dunde</i>        | 38.10 | 96.42  | Wetter | Wei and Lin,1994              |
| <i>Erhai Lake</i>   | 25.78 | 100.19 | drier  | Zhang et al.,2000             |
| <i>Donghai</i>      | 30.95 | 121.87 | Wetter | Zhang et al.,2006             |
| <i>Heqing Basin</i> | 26.77 | 100.21 | drier  | Jiang et al.,1998             |
| <i>Jiuzhoutai</i>   | 36.07 | 103.75 | Wetter | Chen et al.,1991              |
| <i>Hongshui</i>     | 38.18 | 102.76 | Wetter | Zhang et al.,2000             |
| <i>Liuzhouwan</i>   | 42.71 | 116.68 | Wetter | Wang et al.,2001              |
| <i>Weinan</i>       | 34.24 | 109.30 | Wetter | Lu et al.,2007                |
| <i>Weinan</i>       | 34.24 | 109.30 | Wetter | Wu et al.,1994                |

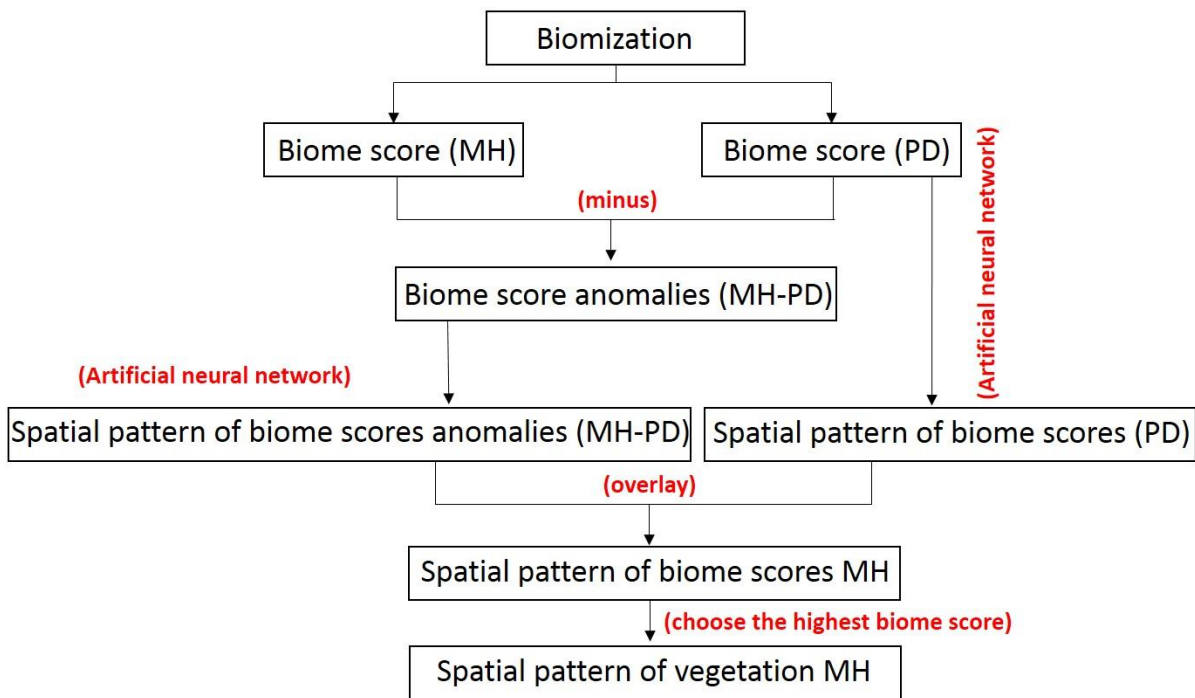

**Figure S1.** The schematic diagram of artificial neural network (ANN)

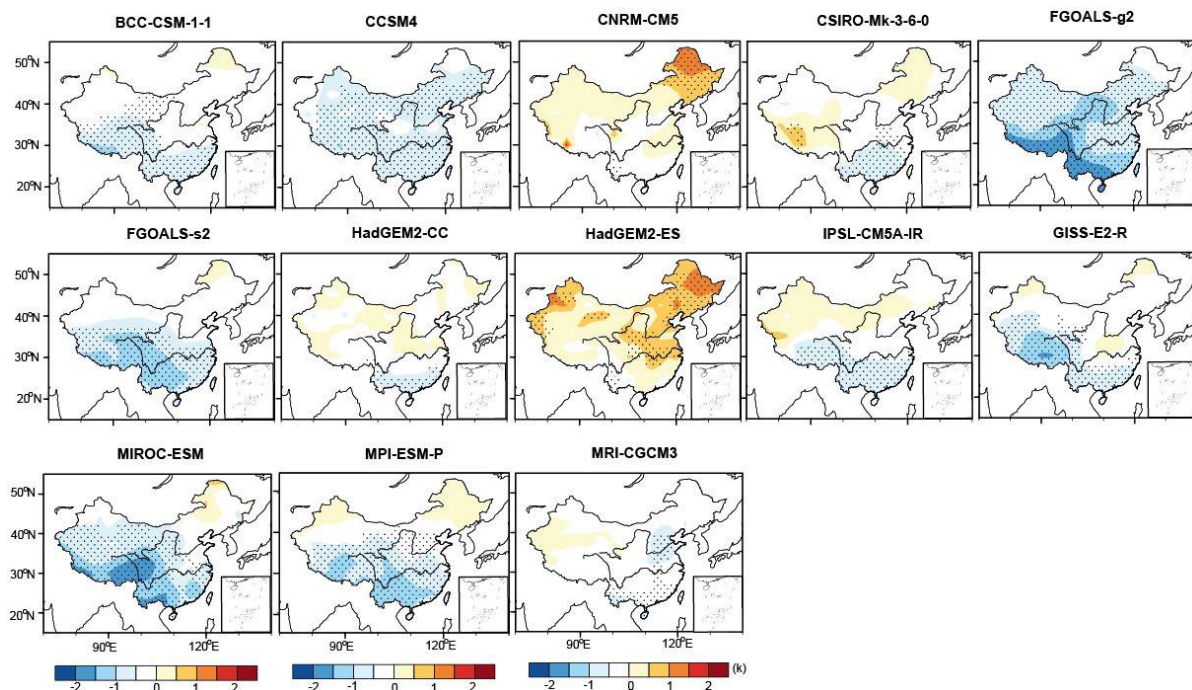

Figure S2. Annual temperature anomaly (MH-PI) calculated as the last 30-year means of each model, the area with points pass the t-test (for 95% confidence interval)

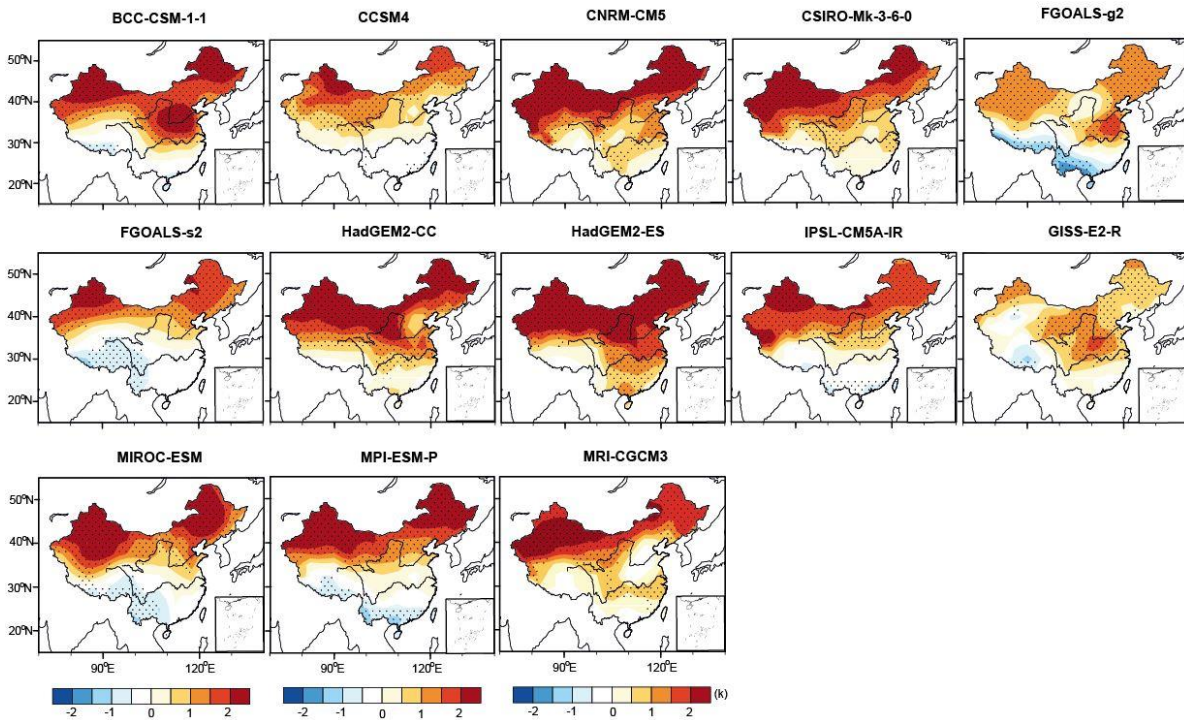

Figure S3. MTWA temperature anomaly (MH-PI) calculated as the last 30-year means of each model, the area with points pass the t-test (for 95% confidence interval)



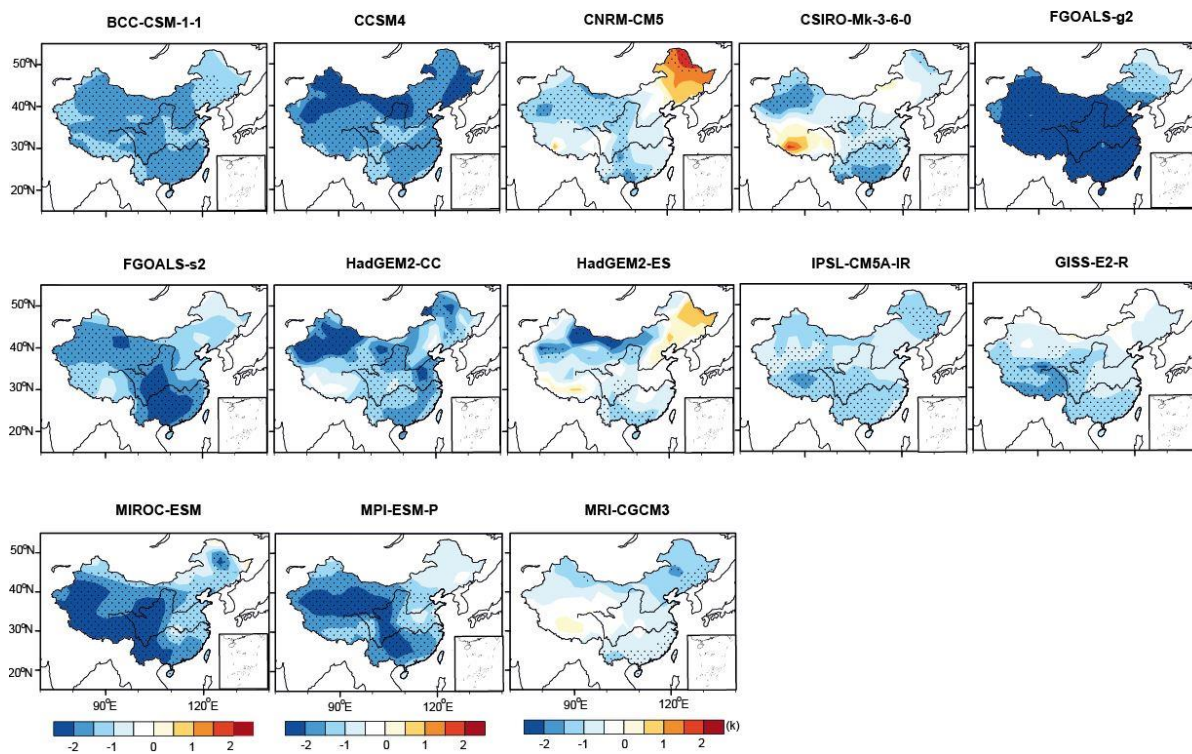

Figure S4. MTCO temperature anomaly (MH-PI) calculated as the last 30-year means of each model, the area with points pass the t-test (for 95% confidence interval)

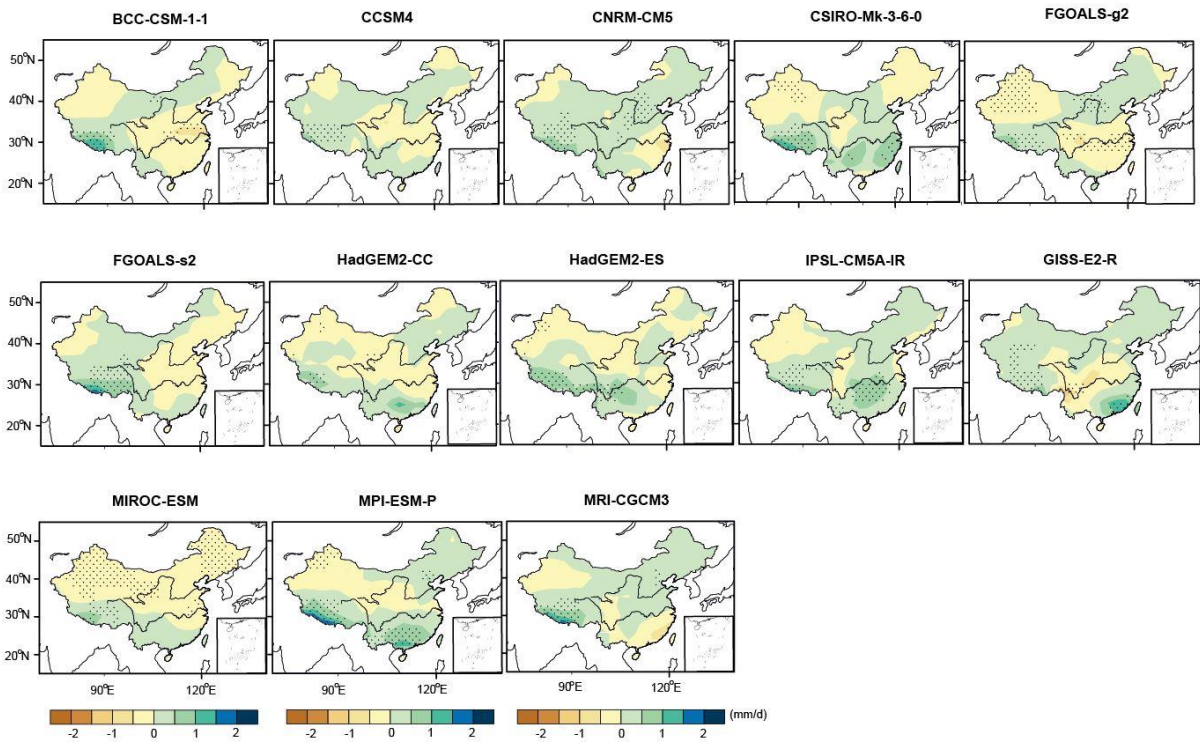

Figure S5. Annual precipitation anomaly (MH-PI) calculated as the last 30-year means of each model, the area with points pass the t-test (for 95% confidence interval).

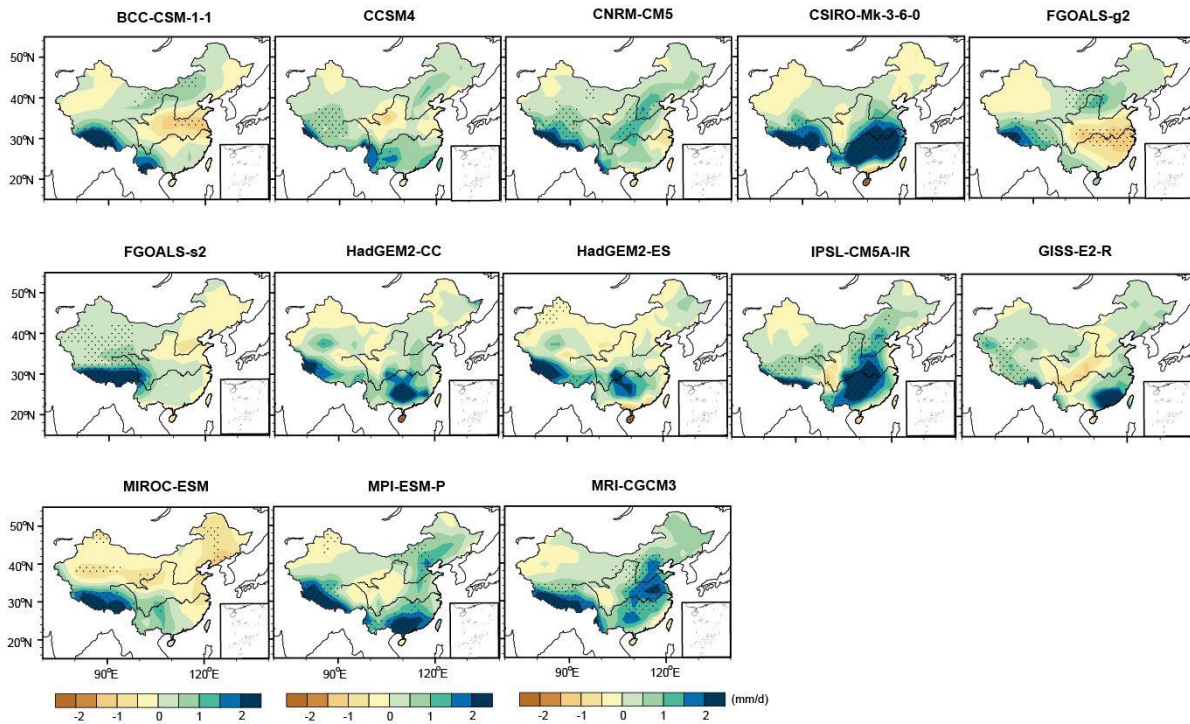

Figure S6. Summer (JJA) precipitation anomaly (MH-PI) calculated as the last 30-year means of each model, the area with points pass the t-test (for 95% confidence interval).

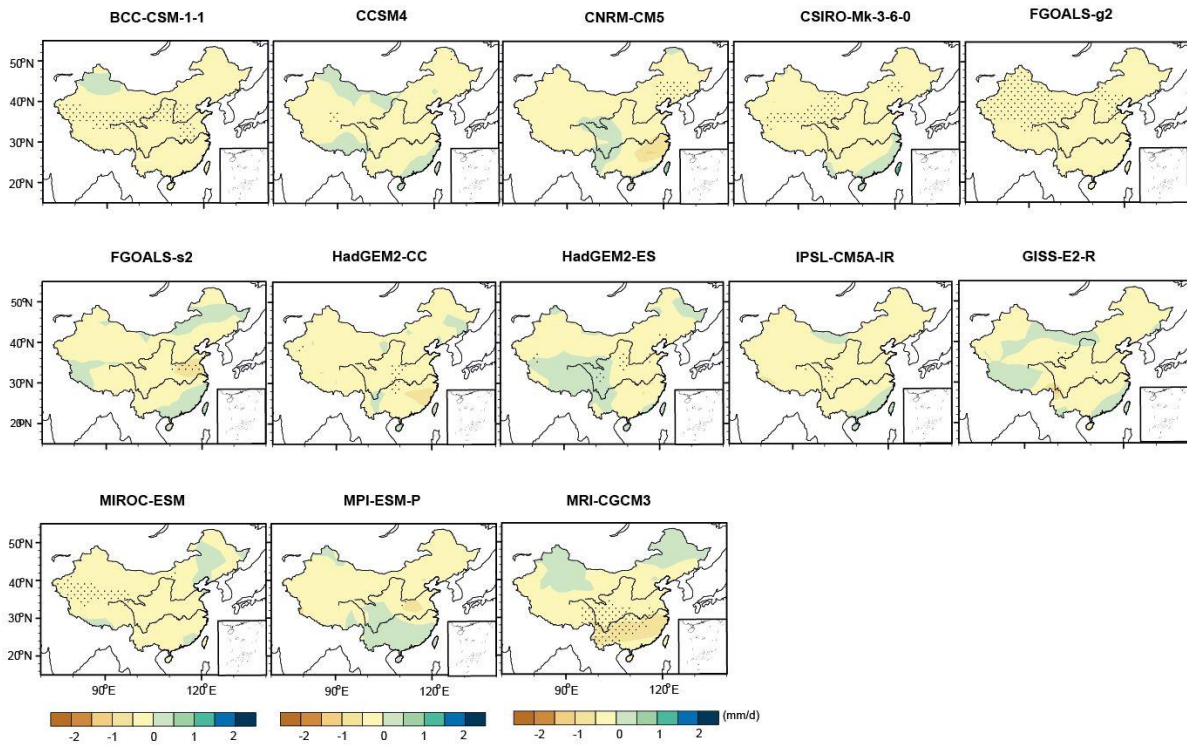

Figure S7. Winter (DJF) precipitation anomaly (MH-PI) calculated as the last 30-year means of each model, the area with points pass the t-test (for 95% confidence interval).

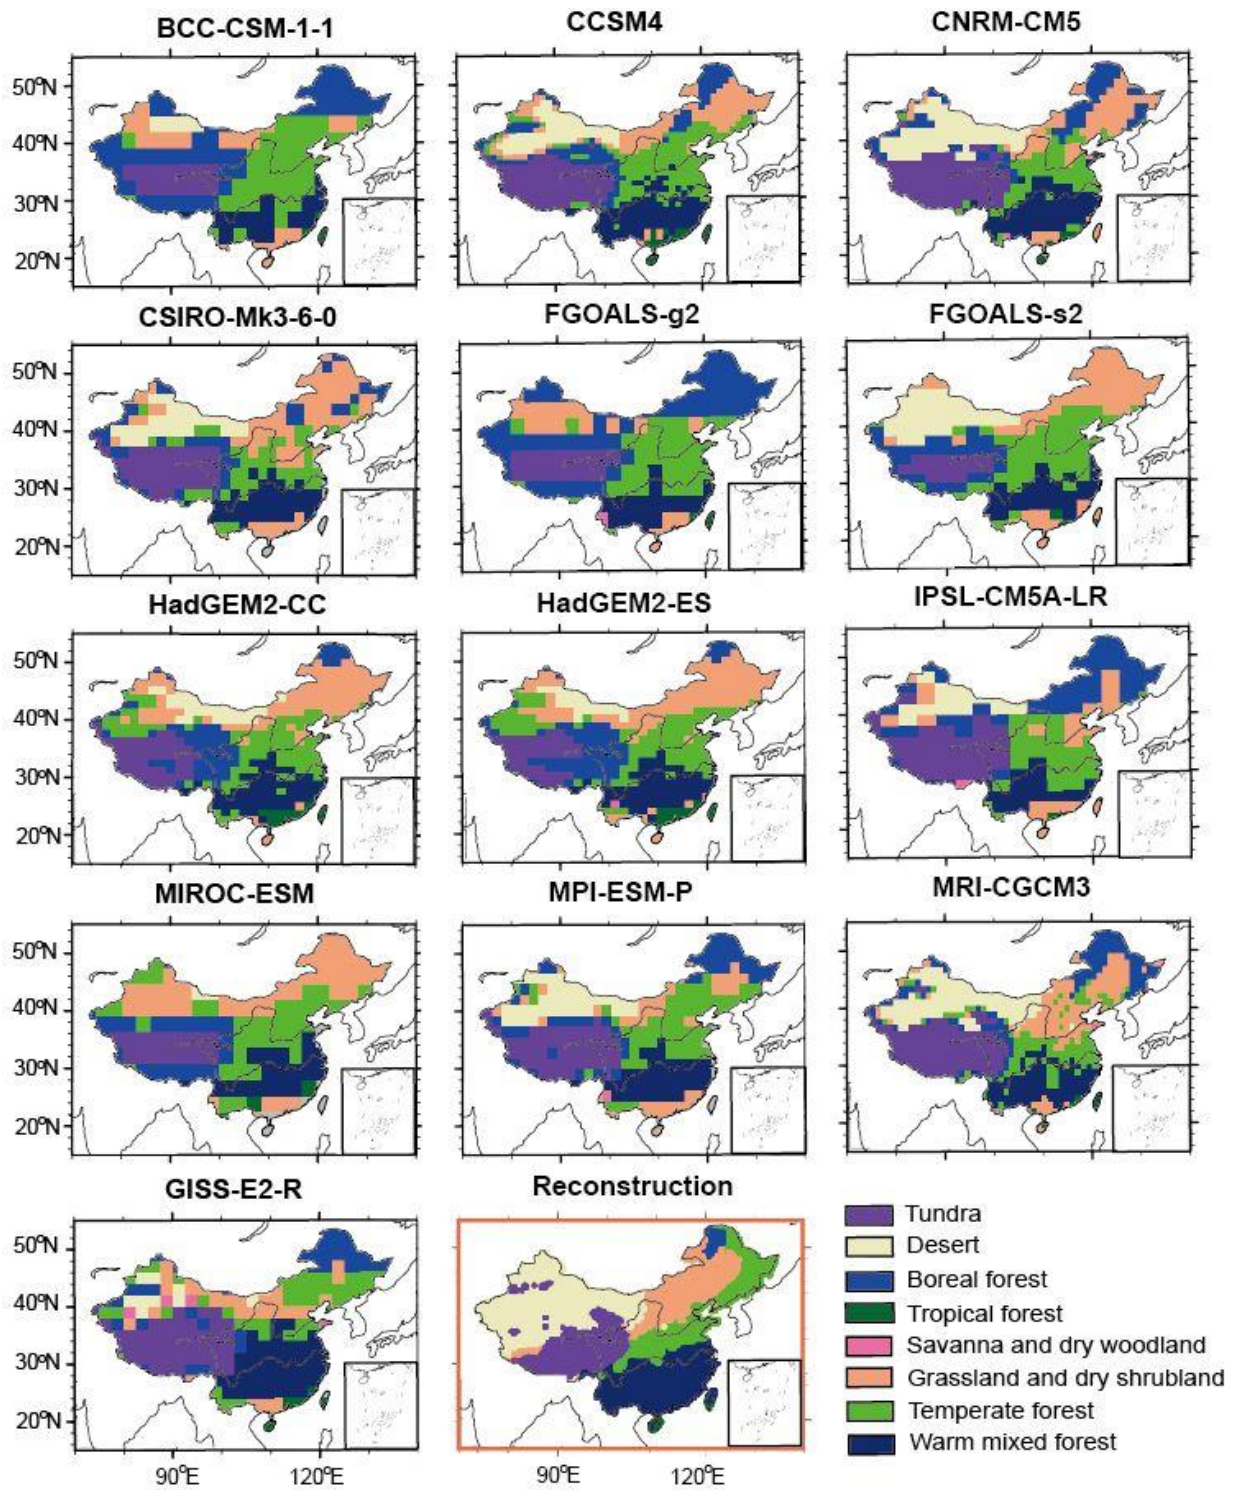

Figure S8. Comparison of interpolated megabiomes distribution (plot in red rectangle) with the simulated spatial pattern from BIOME4 of each model for pre-Industrial.

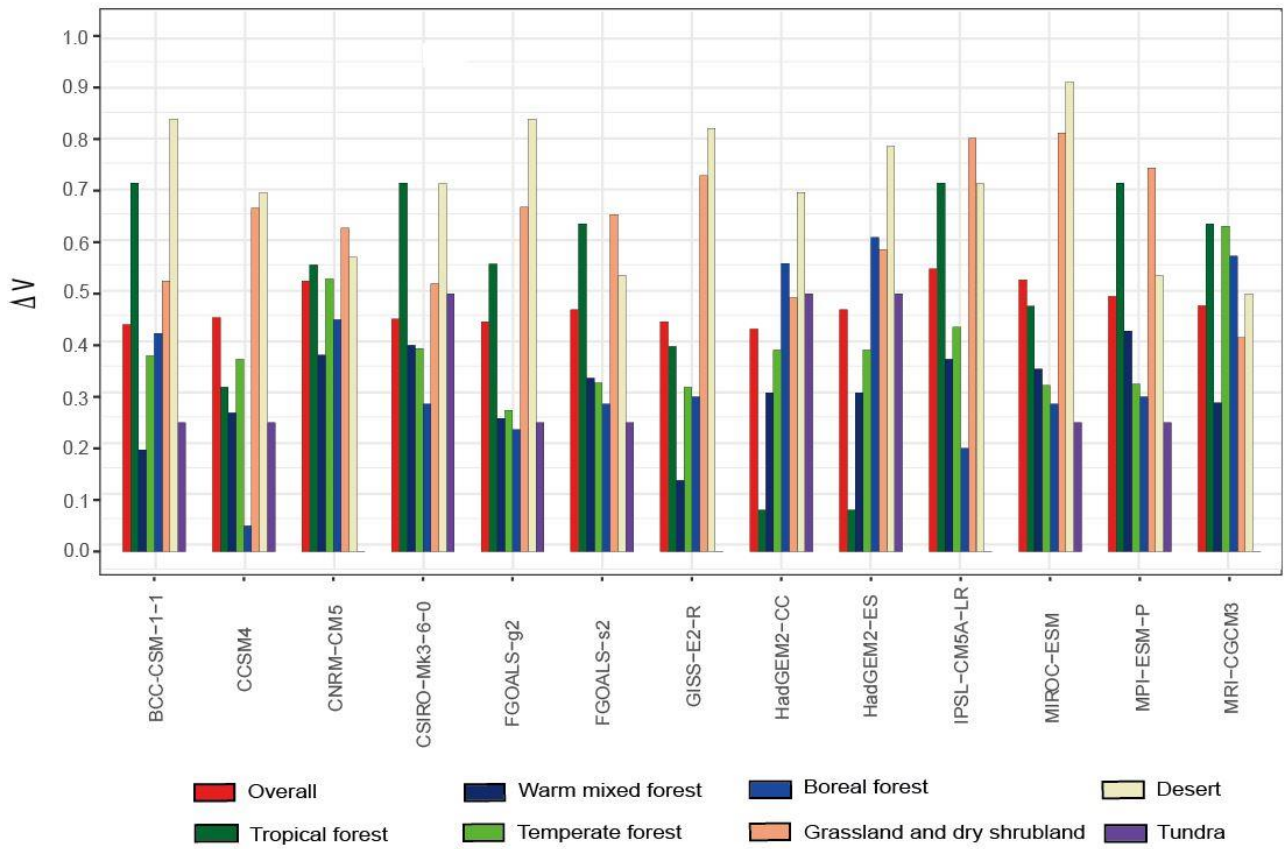

Figure S9. The  $\Delta V$  values of overall and each megabiomes for all 13 models during mid-Holocene, compared to the reconstruction.

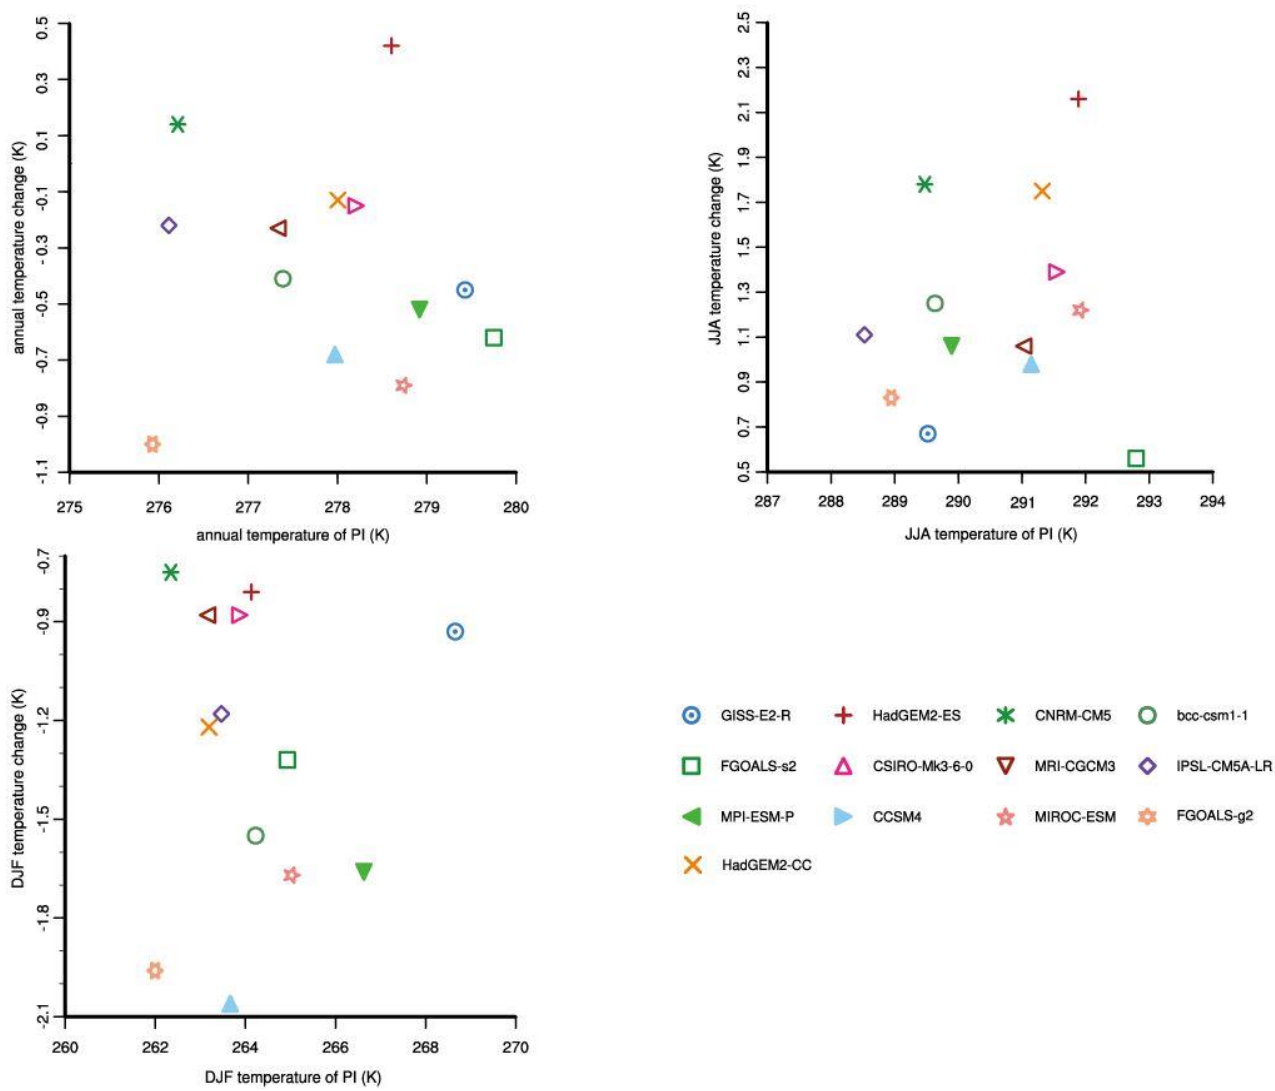

Figure S10. The relationship between PI temperature and temperature anomaly (MH-PI)

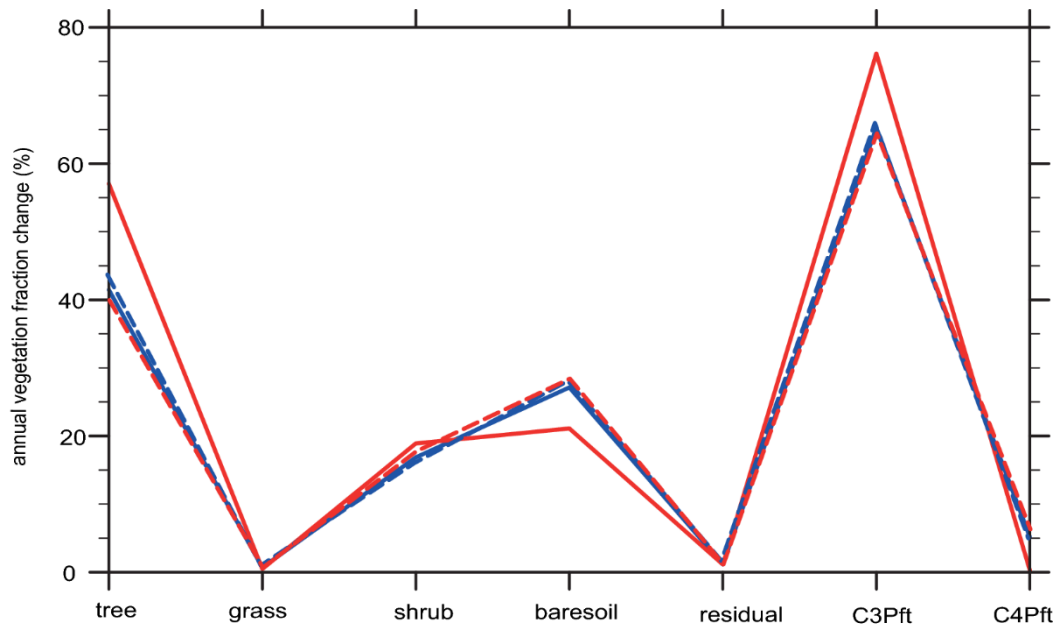

Figure S11. Annual vegetation fraction change (PI: blue line; MH: red line) calculated as the last 30-year means of HadGEM2-ES (PI: blue solid line; MH: red solid line) and HadGEM2-CC (PI: blue dash line; MH: red dash line).

## Reference

- An, C., Feng, Z., and Tang, L.: Evidence of a humid mid-Holocene in the western part of Chinese Loess Plateau, *Chinese Science Bulletin*, 48, 2472-2479, 2003.
- Cai, Y., Chen, Y., Chen, Z., Zhang, W., and Guo, Z.: Climate fluctuation of the western Shanghai district by correspondence analysis since 8.5 ka B.P., *Journal of Lake Science*, 13, 118-126, 2001 (in Chinese with English abstract).
- Chen, F., Chen, X., Chen, J., Zhou, A., Wu, D., Tang, L., Zhang, X., Huang, X., and Yu, J.: Holocene vegetation history, precipitation changes and Indian Summer Monsoon evolution documented from sediments of Xingyun Lake, south-west China, *Journal of Quaternary Science*, 29, 661-674, 2014.
- Chen, F., Li, J., and Zhang, W.: Loess stratigraphy of the Lanzhou profile and its comparison with deep-sea sediment and ice core record, *Geojournal*, 24, 201-209, 1991.
- Chen, F., Shi, Q., and Wang, J.: Environmental changes documented by sedimentation of Lake Yiema in arid China since the late Glaciation, *Journal of Palaeolimnology*, 22, 159-169, 1999.
- Chen, F., Wu, W., Holmes, J. A., Madsen, D. B., Zhu, Y., Jin, M., and Oviatt, C. G.: A mid-Holocene drought interval as evidenced by lake desiccation in the Alashan Plateau, Inner Mongolia China, *Chinese Science Bulletin*, 48, 1401-1410, 2003.



- Chen, F., Yu, Z., Yang, M., Ito, E., Wang, S., Madsen, D. B., Huang, X., Zhao, Y., Sato, T., Birks, H. J. B., Boomer, I., Chen, J., An, C., and Wunnemann, B.: Holocene moisture evolution in arid central Asia and its out-of-phase relationship with Asian monsoon history, *Quaternary Science Reviews*, 27, 351-364, 2008.
- Dallmeyer, A., Claussen, M., Ni, J., Cao, X., Wang, Y., Fischer, N., Pfeiffer, M., Jin, L., Khon, V., Wagner, S., Haberkorn, K., and Herzschuh, U.: Biome changes in Asia since the mid-Holocene and analysis of difference transient Earth system model simulations, *Climate of the Past*, 13, 107-134, 2017.
- Feng, Z., Wang, W., Guo, L., Khosbayan, P., Narantsetseg, T., Jull, A. J. T., An, C., Li, X., Zhang, H., and Ma, Y.: Lacustrine and eolian records of Holocene climate changes in the Mongolian Plateau: preliminary results, *Quaternary International*, 136, 25-32, 2005.
- Gasse, F., Arnold, M., Fontes, J. C., Fort, M., Gibert, E., Huc, A., Li, B., Li, Y., Liu, Q., Melieres, F., Campo, E.V., Wang, F., and Zhang Q.: A 13,000-year climate record from western Tibet, *Nature*, 353, 742-745, 1991.
- Gasse, F., Fontes, J. C., Campo, E. V., and Wei, K.: Holocene environmental changes in Bangong Co basin (Western Tibet). Part 4: Discussion and conclusions, *Palaeogeography, Palaeoclimatology, Palaeoecology*, 120, 79-92, 1996.
- Guiot, J., Wu, H., Jiang, W., and Luo, Y.: East Asian Monsoon and paleoclimatic data analysis: a vegetation point of view, *Climate of the Past*, 4, 137-145, 2008.
- Guo, C., Luo, F., Luo, C., Feng, S., Sun, Q., Yang, Z., and Zhang, J.: Holocene pollen record in the Tangke peat profile of Sichuan and its palaeoclimatic significance. *Acta Palaeontologica Sinica*, 51, 351-358, 2012 (in Chinese with English abstract).
- Herzschuh, U., Birks, H. J. B., Mischke, S., Zhang, C., and Böhner, J.: A modern pollen-climate calibration set based on lake sediments from the Tibetan Plateau and its application to a Late Quaternary pollen record from the Qilian Mountains, *Journal of Biogeography*, 37, 752-766, 2010.
- Herzschuh, U., Borkowski, J., Schewe, J., Mischke, S., and Tian, F.: Moisture-advection feedback supports strong early-to-mid Holocene monsoon climate on the eastern Tibetan Plateau as inferred from a pollen-based reconstruction, *Palaeogeography, Palaeoclimatology, Palaeoecology*, 402, 44-54, 2014.
- Herzschuh, U., Kramer, A., Mischke, S., and Zhang, C.: Quantitative climate and vegetation trends since the late glacial on the northeastern Tibetan Plateau deduced from Koucha Lake pollen spectra, *Quaternary Research*, 71, 162-171, 2009.
- Herzschuh, U., Tarasov, P., Wunnemann, B., and Hartmann, K.: Holocene vegetation and climate of the Alashan Plateau, NW China, reconstructed from pollen data, *Palaeogeography, Palaeoclimatology, Palaeoecology*, 211, 1-17, 2004.
- Herzschuh, U., Winter, K., Wunnemann, B., Li, S.: A general cooling trend on the central Tibetan Plateau throughout the Holocene recorded by the Lake Zigetang pollen spectra, *Quaternary International*, 154-155, 113-121, 2006.
- Hu, C., Henderson, G. M., Huang, J., Xie, S., Sun, Y., and Johnson, K. R.: Quantification of Holocene Asian monsoon rainfall from spatially separated cave records, *Earth and Planetary Science Letters*, 266, 221-232, 2008.
- Huang, K., Wei, J., Chen, B., Zhang, H., Zheng, Z., Cao, L., and Zheng, Y.: Research progress of pollen-based quantitative palaeoclimate reconstruction using Modern Analogue Technique, *Quaternary Sciences*, 33, 1069-1079, 2013 (in Chinese with English abstract).

- Jiang, Q., Shen, J., Liu, X., and Zhang, E.: Holocene climate reconstruction of Ulungur Lake (Xinjiang, China) inferred from ostracod species assemblages and stable isotopes, *Quaternary Sciences*, 27, 382-391, 2007 (in Chinese with English abstract).
- Kashiwaya, K., Masuzawa, T., Morinaga, H., Yaskawa, K., and Yuan, B., Lin J., and Gu, Z.: Changes in hydrological conditions in the central Qing-Zang (Tibetan) Plateau inferred from lake bottom sediments, *Earth and Planetary Science Letters*, 135, 31-39, 1995.
- Kong, Z., Du, N., Shan, F., Tong, G., Luo, S., and Fan, S.: Vegetation and climatic changes in the last 11000 years in Qinghai Lake—Numerical analysis based on palynology in core QH85-14C, *Marine Geology & Quaternary Geology*, 10, 79-90, 1990 (in Chinese with English abstract).
- Kramer, A., Herzsuh, U., Mischke, S., and Zhang, C.: Holocene treeline shifts and monsoon variability in the Hengduan Mountains (southeastern Tibetan Plateau), implications from palynological investigations, *Palaeogeography, Palaeoclimatology, Palaeoecology*, 286, 23-41, 2010.
- Li, B., Li, Y., Kong, Z., and Shan, F., Zhu, L.: Environmental changes during last 20 ka in the Gounongcuo Regions, Kekexili, Tibet, *Chinese Science Bulletin*, 39, 1727-1728, 1994.
- Li, C., Wu, Y., and Hou, X.: Holocene vegetation and climate in Northeast China revealed from Jingbo Lake sediment, *Quaternary International*, 229, 67-73, 2011.
- Li, J., Zhao, Y., Xu, Q., Zheng, Z., Lu, H., Luo, Y., Li, Y., Li, C., and Seppa, H.: Human influence as a potential source of bias in pollen-based quantitative climate reconstructions, *Quaternary Science Reviews*, 99, 112-121, 2014.
- Li, S., and Fan, A.: OSL chronology of sand deposits and climate change of last 18 ka in Gurbantunggut Desert, northwest China, *Journal of Quaternary Science*, 26, 813-818, 2011.
- Li, W., and Liang, Y.: Vegetation and environment of the hypsithermal interval of Holocene in eastern Hebei Plain, *Acta Botanica Sinica*, 27, 640-651, 1985 (in Chinese with English abstract).
- Lin, X., Zhu, L., Wang, Y., Wang, J., Xie, M., Ju, J., Mausbacher, R., Schwalb, A.: Environmental changes reflected by n -alkanes of lake core in Nam Co on the Tibetan Plateau since 8.4 kaB.P., *Chinese Science Bulletin*, 53, 3051-3057, 2008.
- Liu, G., Shen, Y., Wang, R., and Wang, S.: The vegetation and climatic changes in Zoige during the last 20000 years determined by pollen records, *Journal of Glaciology and Geocryology*, 17, 132-137, 1995 (in Chinese with English abstract).
- Liu, H., Tang, C., and Liu, S.: The construction and application of pollen-climate transfer function in Shennongjia Mountain region, *Journal of Central China Normal University (Nature Science)*, 34, 454-459, 2000 (in Chinese with English abstract).
- Liu, Q., Li, Q., Wang, L., and Chu, G.: Stable carbon isotope record of bulk organic matter from a sediment core at Moon Lake in the middle part of the Daxing'an Mountain Range, Northeast China during the last 21ka, *Quaternary Science*, 30, 1069-1077, 2010 (in Chinese with English abstract).
- Long, H., Lai, Z., Fuchs, M., Zhang, J., and Li, Y.: Timing of Late Quaternary palaeolake evolution in Tengger Desert of northern China and its possible forcing mechanisms, *Global and Planetary Change*, 92-93, 119-129, 2012.
- Long, H., Lai, Z., Wang, N., and Li, Y.: Holocene climate variations from Zhuyeze terminal lake records in East Asian monsoon margin in arid northern China, *Quaternary Research*, 74, 46-56, 2010.

- Long, H., Tan, H., Wang, N., Tan, L., and Li, Y.: Mid-Holocene climate variations recorded by palaeolake in marginal area of East Asian Monsoon: A multi-proxy study, *Chinese Geographical Science*, 17, 325-332, 2007.
- Lu, H., Wu, N., Liu, K., Jiang, H., and Liu, T.: Phytoliths as quantitative indicators for the reconstruction of past environmental conditions in China II: Palaeoenvironmental reconstruction in the Loess Plateau, *Quaternary Science Reviews*, 26, 759-772, 2007.
- Lu, H., Wu, N., Liu, K., Zhu, L., Yang, X., Yao, T., Wang, L., Li, Q., Liu, X., Shen, C., Li, X., Tong, G., and Jiang, H.: Modern pollen distributions in Qinghai-Tibetan Plateau and the development of transfer functions for reconstructing Holocene environmental changes, *Quaternary Science Reviews*, 30, 947-966, 2011.
- Ma, Z., Huang, J., Wei, Y., Li, J., and Hu, C.: Organic carbon isotope records of the Poyang Lake sediments and their implications for the paleoclimate during the last 8ka, *Geochimica*, 33, 279-285, 2004 (in Chinese with English abstract).
- Members of Quaternary Pollen Data Base in Institute of Geochemistry, Chinese Academy of Science: The evolution of the environment since 10000 years in the south of Liaoning Province, *Science in China*, 6, 603-614, 1977 (in Chinese).
- Mischek, S., Kramer, M., Zhang, C., Shang, H., Herzschuh, U., and Erzinger, J.: Reduced early Holocene moisture availability in the Bayan Har Mountains, northeastern Tibetan Plateau, inferred from a multi-proxy lake record, *Palaeogeography, Palaeoclimatology, Palaeoecology*, 267, 59-76, 2008.
- Mischke, S., and Wunnemann, B.: The Holocene salinity history of Bosten Lake (Xinjiang, China) inferred from ostracod species assemblages and shell chemistry: Possible palaeoclimatic implications, *Quaternary International*, s154-155, 100-112, 2006.
- Mo, D., Li, F., Li, S., and Kong, Z.: A preliminary study on the paleoenvironment of the Middle Holocene in the Hulu River area in Gansu Province and its effects on human activity, *Acta Geographica Sinica*, 51, 59-69, 1996 (in Chinese with English abstract).
- Qiao, Y., Chen, P., Shen, C., Sun, Y., Zhou, Q., and Jiang, M.: Quantitative reconstruction of vegetation and climate of Fanjingshan section in Guizhou during last 10000 years, *Geochimica*, 25, 445-457, 1996 (in Chinese with English abstract).
- Rhodes, T., Gasse, F., Lin, R., Fontes, J., Wei, K., Bertrand, P., Gibert, E., Melieres, F., Tucholka, P., Wang, Z., and Cheng, Z.: A Late Pleistocene-Holocene lacustrine record from Lake Manas, Zunggar (northern Xinjiang, western China), *Palaeogeography, Palaeoclimatology, Palaeoecology*, 120, 105-121, 1996.
- Rudaya, N., Tarasov, P., Dorofeyuk, N., Solovieva, N., Kalugin, I., Andreev, A., Daryin, A., Diekmann, B., Riedel, F., Tserendash, N., and Wagner, M.: Holocene environments and climate in the Mongolian Altai reconstructed from the Hoton-Nur pollen and diatom records: a step towards better understanding climate dynamics in Central Asia, *Quaternary Science Reviews*, 28, 540-554, 2009.
- Shao, X., Wang, Y., Cheng, H., Kong, X., Wu, J., and Edwards, R. L.: Long-term trend and abrupt events of the Holocene Asian monsoon inferred from a stalagmite  $\delta^{18}\text{O}$  record from Shennongjia in Central China, *Chinese Science Bulletin*, 51, 221-228, 2006.
- Shen, C., Liu, K., Tang, L., and Overpeck, J. T.: Quantitative relationships between modern pollen rain and climate in the Tibetan Plateau, *Review of Palaeobotany and Palynology*, 140, 61-77, 2006.

- Song, C., and Sun, X.: Establishment of the transfer functions of the pollen-climate factors in Northern China and the quantitative climatic reconstruction at DJ core, *Acta Botanica Sinica*, 39, 554-560, 1997 (in Chinese with English abstract).
- Song, C., Wang, B., and Sun, X.: Implication of paleovegetational changes in Diaojiao Lake, Inner Mongolia, *Acta Botanica Sinica*, 38, 568-575, 1996 (in Chinese with English abstract).
- Stebich, M., Rehfeld, K., Schlutz, F., Tarasov, P. E., Liu, J., Mingram, J.: Holocene vegetation and climate dynamics of NE China based on the pollen record from Sihailongwan Maar Lake, *Quaternary Science Reviews*, 124, 275-289, 2015.
- Sun, A., and Feng, Z.: Holocene climatic reconstructions from the fossil pollen record at Qigai Nuur in the southern Mongolian Plateau, *The Holocene*, 23, 1391-1402, 2013.
- Sun, J., Li, S., Han, P., and Chen, Y.: Holocene environmental changes in the central Inner Mongolia, based on single-aliquot-quartz optical dating and multi-proxy study of dune sands, *Palaeogeography, Palaeoclimatology, Palaeoecology*, 233, 51-62, 2006.
- Sun, N., Li, X., Dodson, J., Zhou, X., Zhao, K., and Yang, Q.: The quantitative reconstruction of temperature and precipitation in the Guanzhong Basin of the southern Loess Plateau between 6200 BP and 5600 BP, *The Holocene*, 26, 1200-1207, 2016.
- Tang, L., and An, C.: Pollen records of Holocene vegetation and climate changes in the Longzhong Basin of the Chinese Loess Plateau, *Progress in Natural Science*, 17, 1445-1456, 2007.
- Tang, L., Shen, C., Kong, Z., Wang, F., and Liao, G.: Pollen evidence of climate during the Last Glacial Maximum in eastern Tibetan Plateau, *Journal of Glaciology and Geocryology*, 20, 133-140, 1998 (in Chinese with English abstract).
- Tang, L., Shen, C., Liao, G., Yu, S., and Li, C.: The climate change in southeast part of Tibetan Plateau since the Last Glacial Maximum: Pollen records from the southeast part of Tibetan Plateau, *Science in China Series D-Earth Sciences*, 34, 436-442, 2004 (in Chinese with English abstract).
- Tang, L., Shen, C., Liu, K., and Overpeck, J.T., Changes in South Asian monsoon: New high-resolution paleoclimatic records from Tibet, China, *Chinese Science Bulletin*, 45, 87-91, 2000.
- Tao, S., An, C., Chen, F., Tang, L., Wang, Z., and Lv, Y.: Pollen inferred vegetation and environmental changes since 16.7ka BP at Lake Balikun, Xinjiang, *Chinese Science Bulletin*, 73, 10-19, 2010.
- Thompson, L. G., Yao, T., Davis, M. E., Henderson, K. A., Thompson, E. M., Lin, P., Beer, J., Synal, H. A., Dai, J. C., and Bolzan, J. F.: Tropical Climate Instability: The Last Glacial Cycle from a Qinghai-Tibetan Ice Core, *Science*, 276, 1821-1825, 1997.
- Wang, B., Song, C., Cheng, Q., and Sun, X.: Palaeoclimate reconstruction by adopting the pollen-climate response surface model to analysis the Chasuqi deposition section, *Acta Botanica Sinica*, 40, 1067-1074, 1998 (in Chinese with English abstract).
- Wang, H., Liu, H., Cui, H., Abrahamsen, N.: Terminal Pleistocene/Holocene palaeoenvironmental changes revealed by mineral-magnetism measurements of lake sediments for Dali Nor area, southeastern Inner Mongolia Plateau, China, *Palaeogeography, Palaeoclimatology, Palaeoecology*, 170, 115-132, 2001.
- Wang, H., Liu, J., and Wang, C.: Paleoenvironment of ostracods and pollen record since Middle Holocene in Rutog area, Tibet, *Acta Geologica Sinica*, 84, 1680-1689, 2010 (in Chinese with English abstract).

- Wang, J., and Liu, J.: The records of amino acids and organic carbon isotope for Holocene megathermal in Changbaishan area, *Acta Micropalaeontologica Sinica*, 18, 392-398, 2001 (in Chinese with English abstract).
- Wang, S., Lu, H., Liu, J., and Jorg, F. W. N.: The early Holocene optimum inferred from a high-resolution pollen record of Huguangyan Maar Lake in southern China, *Chinese Science Bulletin*, 52, 2829-2836, 2007.
- Wang, Y., Herzschuh, U., Shumilovskikh, L. S., Mischke, S., Birks, H. J. B., Wischniewski, J., Bohner, J., Schlutz, F., Lehmkuhl, F., Diekmann, B., Wunnemann, B., and Zhang, C.: Quantitative reconstruction of precipitation changes on the NE Tibetan Plateau since the Last Glacial Maximum - extending the concept of pollen source area to pollen-based climate reconstructions from large lakes, *Climate of the Past*, 10, 21-39, 2014.
- Wei, K., and Lin, R.: An enquiry into palaeoclimatic information from oxygen isotopic profile of Dunde ice core in Qilianshan, *Geochimica*, 23, 311-320, 1994 (in Chinese with English abstract).
- Wen, R., Xiao, J., Chang, Z., Zhai, D., Xu, Q., Li, Y., and Itoh, S.: Holocene precipitation and temperature variations in the East Asian monsoonal margin from pollen data from Hulun Lake in northeastern Inner Mongolia, China, *Boreas*, 39, 262-272, 2010.
- Wen, R., Xiao, J., Chang, Z., Zhai, D., Zhou, L., Xu, Q., Li, Y., and Itoh, S.: Holocene vegetation and climate change reflected by the pollen record of Hulun Lake, north eastern Inner Mongolia, *Quaternary Science*, 30, 1105-1115, 2010 (in Chinese with English abstract).
- Wischniewski, J., Mischke, S., Wang, Y., Herzschuh, U.: Reconstructing climate variability on the northeastern Tibetan Plateau since the last Lateglacial-a multi-proxy, dual-site approach comparing terrestrial and aquatic signals, *Quaternary Science Reviews*, 30, 82-97, 2011.
- Wu, J., Wang, S., and Wang, D.: Characters of the evolution of climate and environment of Holocene in Aibi Lake basin in Xinjiang, *Oceanologia et Limnologia Sinica*, 27, 524-530, 1996 (in Chinese with English abstract).
- Wu, N., Lv, H., Sun, X., Guo, Z., Liu, J., and Han, J.: Climate transfer function from opal phytolith and its application in paleoclimate reconstruction of China loess-paleosol sequence, *Quaternary Science*, 3, 270-279, 1994 (in Chinese with English abstract).
- Wu, Y., Andreas, L., Bernd, W., Li, S., and Wang, S.: Holocene climate change in the Central Tibetan Plateau inferred by lacustrine sediment geochemical records, *Science in China Series D: Earth Science*, 50, 1548-1555, 2007.
- Xiao, J., Lu, H., Zhou, W., Zhao, Z., and Hao, R.: Evolution of vegetation and climate since the last glacial maximum recorded at Dahu peat site, South China, *Science in China Series D: Earth Sciences*, 50, 1209-1217, 2007.
- Xiao, J., Xu, Q., Nakamura, T., Yang, X., Liang, W., Inouchi, Y.: Holocene vegetation variation in the Daihai Lake region of north-central China: a direct indication of the Asian monsoon climatic history, *Quaternary Science Reviews*, 23, 1669-1679, 2004.
- Xu, Q., Chen, S., Kong, Z., and Du, N.: Preliminary discussion of vegetation succession and climate change since the Holocene on the Baiyangdian Lake district, *Acta Phytocologica et Geobotanica Sinica*, 12, 143-151, 1988 (in Chinese with English abstract).
- Xu, Q., Li, Y., Bunting, M. J., Tian, F., and Liu, J.: The effects of training set selection on the relationship between pollen assemblages and climate parameters: Implications for reconstructing past climate, *Palaeogeography, Palaeoclimatology, Palaeoecology*, 289, 123-133, 2010.

- Xu, Q., Xiao, J., Li, Y., Tian, F., and Nakagawa, T.: Pollen-Based quantitative reconstruction of Holocene climate changes in the Daihai Lake Area, Inner Mongolia, China, *Journal of Climate*, 23, 2856-2868, 2010.
- Xu, Q., Xiao, J., Nakamura, T., Yang, X., Yang, Z., Liang, W., Inoue, M., and Yang, S.: Quantitative reconstructed climatic changes of Daihai Basin by pollen data, *Marine Geology & Quaternary Geology*, 23, 99-108, 2003 (in Chinese with English abstract).
- Xue, J., and Zhong, W.: Holocene climate change recorded by lacustrine sediment in Barkol Lake and its regional comparison, *Quaternary Science*, 28, 610-620, 2008 (in Chinese with English abstract).
- Yang, X., Ma, N., Dong, J., Zhu, B., Xu, B., Ma, Z., and Liu, J.: Recharge to the Inter-Dune Lakes and Holocene Climatic Changes in the Badain Jaran Desert, Western China, *Quaternary Research*, 73, 10-19, 2010.
- Yang, X., Wang, S., Xue, B., and Tong, G.: Vegetation development and environmental changes in Hulun Lake since Late Pleistocene, *Acta Palaeontologica Sinica*, 34, 647-656, 1995 (in Chinese with English abstract).
- Yang, X., Zhu, Y., Jiang, X., Wu, Y., and Wang, S.: Environmental changes from spore-pollen record of Mianyang region over the past 10000 years, *Journal of Lake Science*, 10, 23-29, 1998 (in Chinese with English abstract).
- Yang, Y., and Wang, S.: Study on mire development and palaeoenvironment change since 9.0 ka B.P. in the east part of the Xiaoxing'anling Mountains, *Journal of Mountain Science*, 20, 129-134, 2002 (in Chinese with English abstract).
- Yang, Y., and Wang, S.: Study on mire development and paleoenvironment change since 8.0 ka B.P. in the northern part of the Sanjiang Plain, *Scientia Geographica Sinica*, 23, 32-38, 2003 (in Chinese with English abstract).
- Yao, T., Jiao, K., Tian, L., Yang, Z., Shi, W., and Thompson, L. G.: Climatic variations since the Little Ice Age recorded in the Guliya Ice Core, *Science in China Series D: Earth Science*, 39, 587-596, 1996.
- Yu, C., Luo, Y., and Sun, X.: A high-resolution pollen records from Ha'ni Lake, Jilin, Northeast China showing climate changes between 13.1 cal.ka B.P. and 4.5 cal.ka B.P., *Quaternary Science*, 28, 929-938, 2008 (in Chinese with English abstract).
- Zhai, Q., Qiu, W., Li, R., Zhao, Y., and Zheng, L.: The Middle and Late Holocene lacustrine sediments and its climate significance of Angulinao-Bojianhaizi Lakes, Inner Mongolia, *Journal of Palaeogeography*, 2, 84-91, 2000 (in Chinese with English abstract).
- Zhang, H., Ma, Y., Wunnemann, B., and Pachur, H. J.: A Holocene climatic record from arid northwestern China, *Palaeogeography, Palaeoclimatology, Palaeoecology*, 162, 389-401, 2000.
- Zhang, H., Qin, J., Lin, Y., Pu, X., and Liu, C.: A study on climate change pattern of the Middle Holocene in Xundian, Yunnan, *Tropical Geography*, 29, 515-519, 2009 (in Chinese with English abstract).
- Zhang, J., and Kong, Z.: Study on vegetation and climate changes in Beijing region since Late Pleistocene, *Chinese Geographical Science*, 9, 243-249, 1999.
- Zhang, M., Cheng, H., Lin, Y., Qin, J., Zhang, H., Tu, L., Wang, H., and Feng, Y.: High resolution paleoclimate environment records from a stalagmite of Dongge Cave since 15000a in Libo, Guangzhou Province, China, *Geochimica*, 33, 65-74, 2004 (in Chinese with English abstract).
- Zhang, M., Yuan, D., Lin, Y., Qin, J., Zhang, C., and Cheng, H.: High resolution climatic records of stalagmite from Xiangshui cave in Guilin since 6.00 ka B.P., *Acta Geoscientia Sinica*, 24, 439-444, 2003 (in Chinese with English abstract).

- Zhang, Y.: Palynological assemblages and paleovegetation and paleoclimate of the Holocene in eastern Shanghai, *Journal of Paleogeography*, 8, 35-41, 2006 (in Chinese with English abstract).
- Zhao, H., Leng, X., and Wang, S.: Distribution, accumulation rate of peat in the Changbaishan Mountains and climate change in Holocene, *Journal of Mountain Science*, 20, 513-518, 2002 (in Chinese with English abstract).
- Zhao, X., Luo, C., Chen, S., Huang, C., Zheng, Z., Dong, H., Zeng, M., Chen, W., Liu, F., Li, Y., and Shao, L.: Quantitative reconstruction of Holocene climate based on pollen data from drill hole QZK6 in Pearl River delta, *Geological Bulletin of China*, 33, 1621-1628, 2014 (in Chinese with English abstract).
- Zhao, X., Tang, L., Shen, C., and Wang, S.: Holocene climatic and sea-level changes in Qingfeng section, Jianhu Country, Jiangsu Province, *Acta Oceanologica Sinica*, 16, 78-88, 1994 (in Chinese with English abstract).
- Zheng, Z.: Holocene pollen analysis and environmental research in the Chanshan Plain, *Tropical Oceanology*, 9, 31-38, 1990 (in Chinese with English abstract).
- Zhnag, Z., Wu, R., Wang, S., Shen, J., Wu, Y., and Li, S.: Environmental evolution recorded by lake sediments from Erhai Lake, Yunnan Province in Holocene megathermal, *Oceanologica et Limnologia Sinica*, 31, 210-214, 2000 (in Chinese with English abstract).
- Zhong, W., and Shu, Q.: Palaeoclimatic and palaeohydrologic oscillations since about 12.0 ka B.P. at Bosten Lake, southern Xinjiang, *Oceanologica et Limnologia Sinica*, 32, 213-220, 2001 (in Chinese with English abstract).
- Zhou, J., Wang, S., and Lu, J.: Climatic and environmental changes from the sediment record of Erhai Lake over the past 100000 years, *Journal of Lake Science*, 15, 104-111, 2003 (in Chinese with English abstract).
- Zhou, W., An, Z., and Head, M. J.: Stratigraphic Division of Holocene Loess in China, *Radiocarbon*, 36, 37-45, 1994.
- Zhou, W., Yu, X., Jull, A. J. T., Burr, G., Xiao, J., Lu, X., and Xian, F.: High-resolution evidence from southern China of an early Holocene optimum and a mid-Holocene dry event during the Past 18,000 Years, *Quaternary Research*, 62, 39-48, 2004.
- Zhou, Y., Lu, H., Joseph, M., Miao, X., James, S., and Ronald, G.: Optically stimulated luminescence dating of aeolian sand in the Otindag dune field and Holocene climate change, *Science in China Series D: Earth Science*, 51, 837-847, 2008.
- Zhu, C., Chen, X., Ma, C., Zhu, Q., Li, Z., and Xu, W.: Spore-pollen-climate factor transfer function and paleoenvironment reconstruction in Dajihu, Shennongjia, Central China, *Chinese Science Bulletin*, 53 (Suppl. D), 42-49, 2008.
- Zhu, L., Wang, J., Lin, X., Ju, J., Xie, M., Li, M., Wu, Y., Daut, G., Mausbacher, R., and Schwalb, A.: Environmental changes reflected by core sediments since 8.4ka in Nam Co, Central Tibet of China, *Quaternary Sciences*, 27, 588-597, 2007 (in Chinese with English abstract).
